# Mapping the Role of Efflux Pumps in the Evolution of Antibiotic Resistance Reveals Near-MIC Treatments Facilitate Resistance Acquisition

Ariel M. Langevin<sup>a,b</sup>, Imane El Meouche<sup>a,b,\*</sup>, Mary J. Dunlop<sup>a,b,#</sup>

<sup>a</sup> Department of Biomedical Engineering, Boston, Massachusetts, USA

<sup>b</sup> Biological Design Center, Boston, Massachusetts, USA

Running Head: Efflux pumps and resistance evolution

<sup>#</sup> Address correspondence to Mary J. Dunlop, [mjdunlop@bu.edu](mailto:mjdunlop@bu.edu)

<sup>\*</sup> Present address: Imane El Meouche, Université de Paris, IAME, UMR1137, INSERM, Paris, France

Word count of Abstract: 249

Word count of Manuscript: 4,141

# **ABSTRACT**

Antibiotic resistance has become a major public health concern as bacteria evolve to evade drugs, leading to recurring infections and a decrease in antibiotic efficacy. Systematic efforts have revealed mechanisms involved in resistance; yet, in many cases, how these specific mechanisms accelerate or slow the evolution of resistance remains unclear. Here, we conducted a systematic study of the impact of the AcrAB-TolC efflux pump and its expression on the evolution of antibiotic resistance. We mapped how population growth rate and resistance change over time as a function of both the antibiotic concentration and the parent strain's genetic background. We compared strains lacking functional AcrAB-TolC efflux pumps, the wild type strain, and those overexpressing the pumps. In all cases, resistance emerged when cultures were treated with chloramphenicol concentrations near the MIC of the parent strain. Strains grown in concentrations just above the MIC were the most prone to evolving high levels of drug resistance, in some cases reaching values that far exceed the concentrations they were treated with. The genetic background of the parent strain also influenced resistance acquisition. The strain overexpressing pumps evolved resistance more slowly and at lower levels than the wild type strain or the strain lacking functional pumps. In contrast, the wild type strain rapidly achieved resistance through mutations in pump genes and their associated regulators. Overall, our results suggest that treatment conditions just above the MIC pose the largest risk for the evolution of resistance, and precise control of pump expression levels accelerates this process.

# **IMPORTANCE**

Combating the rise of antibiotic resistance is a significant challenge. Efflux pumps are an important contributor to drug resistance, and they exist across many cell types and can export

numerous classes of antibiotics. Cells with efflux pumps can regulate pump expression to maintain low intracellular drug concentrations. Here, we explored a three-dimensional evolutionary landscape, in which we mapped how resistance emerged depending on the antibiotic concentration, the presence of efflux pumps and their regulators, and time. We found that treatments just above the antibiotic concentration that inhibits growth of the parent strain were most likely to promote resistance, but that efflux pump levels influence the severity of these outcomes. These results indicate that there are specific treatment regimens and strain backgrounds that are especially problematic for the evolution of resistance.

## INTRODUCTION

Despite the new wave of antibiotic discovery (1–5), bacteria continue to acquire resistance shortly after the introduction of new drugs for medicinal and industrial applications (6, 7). This is due in large part to the overuse of antibiotics, which results in pressures that drive resistance (8). With limited novel antibiotics and numerous futile antibiotics, doctors and scientists alike are presented with the challenge of how to best treat infections while keeping the evolution of resistance in check.

Adaptive evolution studies have begun exploring how certain antibiotic pressures influence the evolution of resistance. For instance, studies using a ‘morbidosat’—a continuous culture device that dynamically adjusts antibiotic concentrations to inhibitory levels—have found numerous targets that can be readily mutated to promote resistance (9–11), as well as identifying how drug switching can limit the evolution of resistance (12). While these studies have provided pivotal insights for this field, the morbidostat design causes antibiotic concentrations to rise to levels that

exceed clinically relevant concentrations due to toxicity for patients (13). In recognition of the drug concentration-dependent nature of evolution, researchers have begun to explore bacterial evolution under treatment conditions with lower antibiotic concentrations as well. Wistrand-Yuen *et al.* found that bacteria grown in sub-inhibitory drug concentrations were still able to achieve high levels of resistance (14–16). Notably, the study identified that the same antibiotic produced unique evolutionary pathways when cells were treated with sub-inhibitory concentrations as opposed to inhibitory concentrations (14).

One limitation of current studies within the field is that they can be difficult to compare due to variations in experimental parameters, such as species, antibiotics, or other experimental conditions (17). Given the unique evolutionary pathways at different antibiotic concentrations, systematic mapping of these evolutionary landscapes could provide an improved understanding of which conditions pose the highest risk by allowing direct comparisons between different antibiotic concentrations. For instance, evolution experiments that were conducted using a range of concentrations for beta-lactams (18) and erythromycin (19) have highlighted the concentration-dependent adaptability of *Escherichia coli*.

There are many mechanisms by which antibiotic resistance can be achieved, including enzymatic inactivation, alteration of antibiotic binding sites, and increased efflux or reduced influx of antibiotics (20, 21). Efflux pumps are omnipresent in prokaryotic and eukaryotic cells alike, and are an important contributor to multi-drug resistance (22). AcrAB-TolC in *E. coli* is a canonical example of a multi-drug efflux pump, providing broad-spectrum resistance and raising the MIC of at least nine different classes of antibiotics (23). The pump is composed of three types of

proteins: the outer membrane channel protein, TolC; the periplasmic linker protein, AcrA; and the inner membrane protein responsible for substrate recognition and export, AcrB (22). Using the proton motive force, AcrB actively exports antibiotics from the cell (22, 24). The presence of AcrAB-TolC efflux pumps can increase a strain's MIC from ~2-fold to ~10-fold, depending on the antibiotic (25–27). Furthermore, genes associated with these multi-drug resistant efflux pumps, including their local and global regulators, are common targets for mutation as strains evolve high levels of drug resistance (15, 28–31).

Recent studies have indicated that in addition to providing modest increases in the MIC due to drug export, pumps can also impact mutation rate and evolvability of strains, which may ultimately be more important for the acquisition of high levels of drug resistance. For example, heterogeneity in efflux pump expression can predispose subsets of bacterial populations to mutation even prior to antibiotic treatment (32). In addition, deleting genes associated with efflux pumps can also reduce evolvability under antibiotic exposure (33). These studies provoke the question of how efflux pumps, and their expression levels, can serve to promote or attenuate the evolution of drug resistance. To address this, we mapped the progression of resistance over time for strains with and without efflux pumps and their native regulator.

Our overall goal in this study was to identify how antibiotic resistance emerges based on the antibiotic concentration, the parent strain's genetic background, and the time since treatment. To achieve this, we used a turbidostat as an evolutionary platform (34) and treated cultures with a range of chloramphenicol concentrations. Chloramphenicol is often used as a last resort antibiotic in multi-drug resistant infections, as most clinical isolates are still susceptible to this

drug (35, 36). We measured the effect of various genetic backgrounds with different pump expression levels. We conducted these tests in a strain lacking functional AcrAB-TolC efflux pumps ( $\Delta$ *acrB*); in the wild type strain with the native regulatory network controlling AcrAB-TolC expression (WT); and in a strain with upregulated expression of the pumps (37), which lacks the local regulator AcrR (AcrAB<sup>+</sup>). We allowed the cultures to grow and evolve for 72 h in continuous culture while continuously recording growth rates. We periodically sampled the cultures and assessed the population's resistance. We then charted the evolutionary landscapes under different antibiotic concentrations, genetic backgrounds, and through time and identified which circumstances gave rise to resistance.

## RESULTS

In order to systematically evaluate the evolutionary landscape of efflux pump-mediated antibiotic resistance, we used the eVOLVER, a modular turbidostat capable of growing independent cultures in parallel (34). This platform allowed us to track a culture's fitness by measuring growth rate continuously over multi-day experiments. In addition to this, we collected samples at selected intervals and, with these samples, performed antibiotic disc diffusion assays to assess the population's resistance and spot assays to quantify the presences of high-resistance isolates within the population (Figure 1).

We mapped growth rates over time for cultures subjected to a range of chloramphenicol treatment concentrations (Figure 2A & Figure S1). Treatment with high concentrations of chloramphenicol repressed bacterial growth for multiple days. We observed this growth inhibition for chloramphenicol concentrations  $>5\times \text{MIC}^0$ , where we define  $\text{MIC}^0$  as the MIC of

the parent strain. Cultures grown in lower chloramphenicol concentrations were able to recover growth. For example, when we treated the bacterial populations with concentrations that were at or above  $MIC^0$  but below  $5x MIC^0$ , we observed a significant decrease in the growth rate between 0 and 12 h. However, after 12 to 24 h, growth in these populations was partially restored. Below  $MIC^0$ , cultures were able to grow, though usually at a deficit compared to conditions without chloramphenicol. Growth recovery results for the three strains ( $\Delta acrB$ , WT, and AcrAB+) were qualitatively similar when normalized by the  $MIC^0$  value. As such, complete growth inhibition occurred at a lower chloramphenicol concentration in the  $\Delta acrB$  strain than in WT or AcrAB+, although overall recovery patterns were similar.

The growth rate results suggested the evolution of drug resistance within the population. To quantify this, we used an antibiotic disc assay to map the corresponding resistance levels (Figure 2B & Figure S2). We found distinct increases in resistance levels that corresponded to populations which recovered growth. While there were qualitative similarities for the three strains, the timing and level of resistance achieved was dependent on the strain background. The WT strain was able to rapidly achieve high levels of resistance for a broad range of chloramphenicol treatment concentrations. Resistance generally emerged within 12-24 h for concentrations that ranged from below  $MIC^0$  up to  $5x MIC^0$ . In contrast, the  $\Delta acrB$  cells achieved resistance more slowly, but were ultimately able to reach levels of resistance comparable to the WT strain. Resistance acquisition for  $\Delta acrB$  occurred within a comparatively small range of chloramphenicol concentrations, centered just above  $MIC^0$ . The AcrAB+ strain, where efflux pumps are overexpressed, was able to evolve resistance, though this occurred more slowly and under a narrower range of treatment concentrations than in the WT strain.

To compare the ultimate resistance levels for the three strains, we calculated the final MIC of the populations at 72 h ( $MIC^f$ ). We found that treatments concentrations  $\sim 2x MIC^0$  produced the most resistant populations (Figure 2C). The selective pressures of sub-inhibitory antibiotic concentrations have often been considered high-risk for the evolution of resistance (14, 38). Yet, our results indicated that concentrations near or just above  $MIC^0$  lead to the highest resistance levels in these conditions. While the range of raw chloramphenicol values that support the evolution of resistance varied between the strains, when we normalized by  $MIC^0$ , AcrAB+ had the narrowest region of chloramphenicol concentrations that resulted in resistance. These results suggest that AcrAB+ has a reduced capacity to evolve resistance relative to the other strains.

We next asked how resistance and growth changed through time. We found that in the absence of antibiotics, the trajectories trended largely towards faster growth, with minimal changes to resistance levels (Figure 3). With sub- $MIC^0$  chloramphenicol treatment, we observed that the populations first experienced a slight growth decrease, followed by increased resistance, and then restored growth within 48 h. While these populations did gain resistance, they did not tend to reach very high  $MIC^f$  values. In contrast, at 1x and 2x  $MIC^0$  chloramphenicol treatment, there was a more dramatic reduction in growth within the first 12 h. Though growth was impacted, the populations tended to walk towards high resistance during this period. As depicted in the schematics, the zig-zag patterns trending towards high resistance may be indicative of the cultures acquiring resistant mutations and compensating for the associated fitness costs of these mutations. Finally, bacteria treated with 10x  $MIC^0$  first became more susceptible and then stopped growing entirely within 12 h; growth was never restored for these populations. We



found that strains from all three genetic backgrounds followed similar evolutionary trajectories while balancing the trade-off between growth and resistance. These findings highlight the importance of using antibiotic concentrations that are sufficiently inhibitory.

While these results tell us about the growth rate and resistance of the overall population, it is difficult to determine if sub-populations of cells within the culture have acquired high levels of resistance from disc assays alone. First, because the disc assays do not quantify resistance associated with individual cells in the culture, they cannot reveal the presence of subpopulations of resistant and susceptible cells. Second, beyond a certain resistance level, cells will grow up to the boundary of the disc; thus, it is not possible to quantify resistance increases beyond this. Determining which conditions can give rise to high levels of resistance is important for revealing particularly dangerous treatment regimes. In addition, sub-populations with increased resistance to one antibiotic can promote cross-resistance to other drugs (38).

To quantify the fraction of resistant cells that emerged during our evolution experiment, we conducted a spot assay, in which we measured the fraction of the population capable of surviving on specific chloramphenicol concentrations. For all three strains, we observed sub-populations that were capable of growing on 10  $\mu\text{g/mL}$  chloramphenicol (Figure 4A & Figure S3). Interestingly, these cells primarily emerged from treatment conditions with lower levels of chloramphenicol, and not from conditions where cells were subjected to 10  $\mu\text{g/mL}$  chloramphenicol. For example, over 5% of the population from each of the three WT replicates that were treated at 2  $\mu\text{g/mL}$  chloramphenicol could survive on 10  $\mu\text{g/mL}$  at the end of the experiment. We did find cases where WT cells treated with 10  $\mu\text{g/mL}$  evolved resistance to 10

μg/mL, however this was less common than in treatments near MIC<sup>0</sup>. Thus, cultures were able to evolve resistance to higher levels of chloramphenicol than they were subjected to, a feature that was most pronounced when treatments were just above or at MIC<sup>0</sup>. These results closely match trends in the population's overall resistance (Figure 2B). We also found isolates capable of growing on 20 μg/mL chloramphenicol, with a reduced frequency relative to 10 μg/mL (Figure 4B & Figure S3-S4).

Interestingly, the *ΔacrB* strain consistently produced sub-populations that were able to grow at 20 μg/mL (or 40x MIC<sup>0</sup>) chloramphenicol by 72 h. This sub-population appeared for chloramphenicol concentrations around 2 μg/mL. WT results followed a similar trend, with resistance to both 10 and 20 μg/mL chloramphenicol evolving by 72 h. In contrast, the AcrAB<sup>+</sup> strain was capable of evolving resistance to 10 μg/mL when treated with chloramphenicol concentrations slightly above MIC<sup>0</sup>; yet, AcrAB<sup>+</sup> never produced a sub-population that was able to grow on 20 μg/mL as the other strains did. These results were consistent with our findings that AcrAB<sup>+</sup> is less prone to evolve high levels of resistance than the *ΔacrB* or the WT strains are.

A key question remained: which mutations were responsible for the increases in resistance we observed? To address this, we used whole genome sequencing to analyze three biological replicates from the 72 h timepoint for the WT strain (Figure S5). All of the sequenced isolates had a point mutation in the DNA binding region of *marR*, which can upregulate AcrAB-TolC efflux pumps and expression of other stress response genes (39). Additionally, two isolates had an IS1 or IS5 insertional sequence interrupting *acrR*, which would upregulate *acrAB* (40). The other isolate had a single point mutation in a periplasmic encoding region of *acrB*, in close

proximity to a site found to aid in chloramphenicol resistance (41, 42). These sequencing results indicate that strains containing AcrAB-TolC efflux pumps use mutations related to the pumps and their regulation to optimize survival and increase resistance in the presence of antibiotics.

## DISCUSSION

In this work, we identified that treating strains with antibiotic concentrations close to MIC<sup>0</sup> is problematic for the evolution of resistance; however, the evolvability and ultimate resistance level achieved depend heavily on the genetic background. For  $\Delta$ *acrB*, WT, and AcrAB+ strains, we observed some common features between the evolutionary landscapes, where reductions in growth rate were followed by increases in resistance. Yet, despite qualitative similarities, the degree to which these strains became resistant depended on the presence of AcrAB-TolC efflux pumps. WT bacterial populations with access to precise control of resistance machinery (i.e. efflux pumps and control of stress response regulators), evolved mutations that conferred high levels of resistance within 48 h after antibiotic exposure. The three biological replicates developed similar mutations in *marR*, *acrR*, and *acrB* to upregulate AcrAB-TolC efflux pumps in the WT strain, resulting in a population capable of surviving 10x MIC<sup>0</sup> chloramphenicol treatment. These results are consistent with findings from drug resistance studies that have identified point mutations and insertional sequences in regulators that serve to upregulate efflux pumps (11, 24, 43–45). Notably, AcrAB+, which overexpresses efflux pumps, was less evolvable and never achieved as high levels of resistance as the WT strain, suggesting that both having pumps and the ability to precisely control their expression together are important in the evolution of resistance. This reduced evolvability of AcrAB+ may be a result of the fitness burden of constitutive pump overexpression (25, 46). In contrast, we found that under certain

conditions the  $\Delta acrB$  strain evolved to survive on 40x MIC<sup>0</sup>. This phenomenon agrees with results by Cudkowicz & Schuldiner, who found that evolving  $\Delta acrB$  produced a more resistant population than evolving WT. They showed that the  $\Delta acrB$  strain gained high resistance by optimizing redundant efflux pumps in *E. coli*, such as AcrEF and MdtEF (11). Taken together, these findings suggest that carefully modulating the exact levels of pump expression may be critical for evolving resistance.

Our results identify antibiotic treatment regimes that are especially prone to mutation. While doctors measure resistance of bacterial infections, they sometimes prescribe antibiotic treatment prior to obtaining the results of this assay (47) or use a treatment concentration too low to effectively penetrate an infection site (48). This blind treatment could lead to increased levels of resistance (49, 50). Yet, potentially more dangerous are the differences between the simulated plasma-concentration and measured plasma-concentrations of patients. In a study at the Kenya Medical Research Institute, patients were administered a concentration of chloramphenicol well above the MIC for the *Streptococcus pneumoniae* being treated (51). Researchers simulated the administered dosing regime and later measured the plasma-concentration; their findings demonstrated that the true concentration of chloramphenicol in the patients was often 2-5x MIC, as opposed to the 5-10x MIC anticipated. These findings are relevant in that we found that *in vitro* chloramphenicol treatments under 10x MIC, especially 1-2x MIC treatments, most readily promote the emergence of highly resistant bacterial populations. Reding *et al.* similarly observed this hotspot for adaptability of *E. coli* in the presence of another antibiotic, erythromycin, just below its MIC (19). Although it is essential for healthcare workers to be mindful of toxicity and

accessibility, our results highlight the presence of regimes that are especially problematic and which should be avoided to limit evolution of antibiotic resistance.

By charting evolutionary landscapes across different antibiotic concentrations, different parent strains, and time, we have gained insight into treatments that impact the emergence of antibiotic resistance and the role of efflux pumps in this process.

## METHODS

### Strains and Plasmids

We used *E. coli* strains BW25113 (WT), BW25113  $\Delta acrB$  ( $\Delta acrB$ ), and BW25113  $\Delta acrR$  ( $\Delta acrR$ ). The wild type strain BW25113 is the parent strain for the Keio collection (52). BW25113  $\Delta acrB$  was derived from Keio collection strain JW0451 (BW25113  $\Delta acrB::kan^R$ ) (25). For BW25113  $\Delta acrR$ , we designed primers with homology regions on *acrR* and amplified the kanamycin resistance marker and FRT sites of pKD13 (52). Primers are listed in Table S1. The linear DNA was then treated using a DpnI digest and PCR purification. We electroporated the purified linear DNA into competent BW25113 cells containing the plasmid pSIM6 (53). We removed kanamycin resistance markers following the pCP20 protocol from Reference (54).

### Determination of MIC

For all experiments, overnight cultures were inoculated from a single colony in 10 mL LB and grown in a 50 mL Erlenmeyer flask at 37°C with 200 rpm orbital shaking. After overnight growth, the optical density at 600 nm ( $OD_{600}$ ) was measured, and the initial volume was diluted back to  $OD_{600} = 0.1$ . To determine the MIC of the parent strains (Fig. S7), we added a final

concentration of 0, 0.2, 0.5, 1, 2, 4, 8, or 12  $\mu\text{g/mL}$  to each culture; to determine the MIC of the evolved strains (Fig. S6), we added 0, 0.5, 1, 2, 5, 10, 20, or 50  $\mu\text{g/mL}$  to each culture. The samples were sealed with evaporation-limiting membranes (Thermo Scientific AB-0580) and grown in 24-well plates at  $37^\circ\text{C}$  with 200 rpm orbital shaking.  $\text{OD}_{600}$  readings were taken using a BioTek Synergy H1m plate reader before incubation ( $t = 0$  h) and after antibiotic exposure ( $t = 24$  h). All experiments were performed in triplicate using biological replicates.

## Experimental Conditions in the eVOLVER

In the eVOLVER, cultures were inoculated from a single colony in LB at  $37^\circ\text{C}$ . A stir bar mixed the cultures on a medium setting, or approximately 1000 rpm (34). The LB was supplemented with detergent Tween20 (Sigma Aldrich Cat. # P1379) at 0.2% (v/v) to reduce spurious  $\text{OD}_{600}$  measurements caused by biofilm growth on the flask.

Cells were inoculated in the eVOLVER overnight ( $t \approx -16 - -14$  h) prior to the beginning of the experiment ( $t = 0$  h) to establish steady-state exponential growth. We set the eVOLVER using an upper  $\text{OD}_{600}$  bound of 0.2 and a lower bound of 0.1; thus, cultures were grown to a turbidity of 0.2 and then diluted back to 0.1 to maintain the turbidostat at approximately constant cell density. Samples were collected during the experiment at set time points ( $t = 0, 1, 3, 6, 12, 24, 48$ , and 72 h) and used for downstream analysis. All experiments were performed in triplicate using biological replicates.

At  $t = 0$  h, we introduced chloramphenicol at a predetermined final treatment concentration ( $[\text{Cm}] = 0, 0.2, 0.5, 1, 2, 5, 10$ , or 20  $\mu\text{g/mL}$ ). This introduction was implemented by switching

the media source from one containing 0 µg/mL chloramphenicol to another containing the final treatment concentration; in addition, we spiked the samples directly with the treatment concentration of chloramphenicol at the same time to avoid a delay due to the time required for media cycling in the turbidostat.

## **Downstream Assays and Data Collection from eVOLVER Samples**

### Growth Rate Measurements

Growth rate measurements were calculated after each dilution event using:

$$\text{Growth Rate} = \frac{\ln\left(\frac{OD_{600,high}}{OD_{600,low}}\right)}{t_{OD_{600,high}} - t_{OD_{600,low}}}$$

The growth rate between each dilution was then averaged across sampling time points to compare against disc diffusion assays and spot assays. For example, the growth rate given at t = 0 h is the growth rate from t = -6 h to t = 0 h.

### Antibiotic Disc Diffusion Assay

We aliquoted samples from the eVOLVER, where the OD<sub>600</sub> from each sample was between 0.1 and 0.2. We used cotton swabs to cover LB agar plates with a layer of the sample (55). An antibiotic disc containing chloramphenicol (30 g) (Thermo Fisher Scientific Cat. # CT0013B) was then placed on the plate. The plate was incubated for 24 h at 37°C. The diameter of the zone of inhibition around each disc was then measured. Diameter of inhibition zones were classified as susceptible, intermediate, or resistant based on Reference (56). Additionally, we calculated the MIC using a linear mapping between MIC and diameter of inhibition zones for our samples (Figure S6) (57).

336

# 337 Spot Assay

338 The samples from the eVOLVER experiment were diluted in PBS to the following dilution  
 339 series: 1, 10<sup>-1</sup>, 10<sup>-2</sup>, 10<sup>-3</sup>, 10<sup>-4</sup>, and 10<sup>-5</sup>. We then plated 2.5 µL of each dilution on LB agar plates  
 340 containing 0, 0.5, 1, 2, 5, 10, and 20 µg/mL chloramphenicol. The plates were then incubated for  
 341 24 h at 37°C. To count colonies, we identified the dilution factor with the most countable  
 342 colonies, and recorded the number of colony forming units (*CFU*) and dilution factor (*d*). The  
 343 CFU/mL for each sample was then calculated by:

$$CFU/mL = \frac{CFU * d}{V}$$

344 where *V* is the volume plated. We also calculated the proportion of the population able to grow  
 345 on different concentrations of chloramphenicol by calculating the CFU/mL from LB agar plates  
 346 containing 0, 0.5, 1, 2, 5, 10, and 20 µg/mL chloramphenicol.

347

# 348 **Whole Genome Sequencing**

349 DNA was extracted from single isolates and parent strains using the QIAGEN DNeasy  
 350 PowerBiofilm kit. Samples were sequenced at the Microbial Genome Sequencing Center (MiGS)  
 351 in Pittsburg, PA, USA, who conducted library preparation based on the Illumina Nextera kit  
 352 series and then sequenced using a NextSeq 550 platform with 150 bp paired-ends and an average  
 353 coverage of 50 reads. We analyzed reads using *breseq* (58) version 0.35.1. Sequenced WT  
 354 isolates were from experiments treated with 2 µg/mL chloramphenicol in the eVOLVER for 72 h  
 355 and then isolated on 20 µg/mL chloramphenicol.

356

# 357 **Data Availability**



The datasets generated during this study are available from the corresponding author upon reasonable request.

# **ACKNOWLEDGEMENTS**

This research was supported by the National Science Foundation (grant No. 1347635) and the National Institutes of Health (grant No. R01AI102922).

We thank Dr. Mo Khalil, Dr. Brandon Wong, Dr. Chris Mancuso, and Zack Heins for their assistance and support with the eVOLVER.

# **REFERENCES**

1. Smith PA, Koehler MFT, Girgis HS, Yan D, Chen Y, Chen Y, Crawford JJ, Durk MR, Higuchi RI, Kang J, Murray J, Paraselli P, Park S, Phung W, Quinn JG, Roberts TC, Rougé L, Schwarz JB, Skippington E, Wai J, Xu M, Yu Z, Zhang H, Tan MW, Heise CE. 2018. Optimized arylomycins are a new class of Gram-negative antibiotics. *Nature* 561:189–194.
2. Sousa MC. 2019. New antibiotics target the outer membrane of bacteria. *Nature*. NLM (Medline).
3. Imai Y, Meyer KJ, Iinishi A, Favre-Godal Q, Green R, Manuse S, Caboni M, Mori M, Niles S, Ghiglieri M, Honrao C, Ma X, Guo JJ, Makriyannis A, Linares-Otoya L, Böhringer N, Wuisan ZG, Kaur H, Wu R, Mateus A, Typas A, Savitski MM, Espinoza JL, O’Rourke A, Nelson KE, Hiller S, Noinaj N, Schäberle TF, D’Onofrio A, Lewis K. 2019. A new antibiotic selectively kills Gram-negative pathogens. *Nature* 576:459–464.

4. Hart EM, Mitchell AM, Konovalova A, Grabowicz M, Sheng J, Han X, Rodriguez-Rivera FP, Schwaid AG, Malinverni JC, Balibar CJ, Bodea S, Si Q, Wang H, Homsher MF, Painter RE, Ogawa AK, Sutterlin H, Roemer T, Black TA, Rothman DM, Walker SS, Silhavy TJ. 2019. A small-molecule inhibitor of BamA impervious to efflux and the outer membrane permeability barrier. *Proc Natl Acad Sci U S A* 116:21748–21757.
5. Luther A, Urfer M, Zahn M, Müller M, Wang SY, Mondal M, Vitale A, Hartmann JB, Sharpe T, Monte F Lo, Kocherla H, Cline E, Pessi G, Rath P, Modaresi SM, Chiquet P, Stiegeler S, Verbree C, Remus T, Schmitt M, Kolopp C, Westwood MA, Desjonquères N, Brabet E, Hell S, LePoupon K, Vermeulen A, Jaisson R, Rithié V, Upert G, Lederer A, Zbinden P, Wach A, Moehle K, Zerbe K, Locher HH, Bernardini F, Dale GE, Eberl L, Wollscheid B, Hiller S, Robinson JA, Obrecht D. 2019. Chimeric peptidomimetic antibiotics against Gram-negative bacteria. *Nature* 576:452–458.
6. Davies J, Davies D. 2010. Origins and Evolution of Antibiotic Resistance. *Microbiol Mol Biol Rev* 74:417–433.
7. England PH. 2015. Health Matter – tackling antimicrobial resistance. GOVUK.
8. Ventola CL. 2015. The Antibiotic Resistance Crisis: Part 1: Causes and Threats. *Pharm Ther* 40:277–283.
9. Toprak E, Veres A, Yildiz S, Pedraza JM, Chait R, Paulsson J, Kishony R. 2013. Building a morbidostat: An automated continuous-culture device for studying bacterial drug resistance under dynamically sustained drug inhibition. *Nat Protoc* 8:555–567.
10. Toprak E, Veres A, Michel J-B, Chait R, Hartl DL, Kishony R. 2011. Evolutionary paths to antibiotic resistance under dynamically sustained drug selection. *Nat Genet* 44:101.
11. Alon Cudkowicz N, Schuldiner S. 2019. Deletion of the major *Escherichia coli* multidrug

transporter AcrB reveals transporter plasticity and redundancy in bacterial cells. PLoS

One 14:e0218828.

12. Yoshida M, Reyes SG, Tsuda S, Horinouchi T, Furusawa C, Cronin L. 2017. Time-programmable drug dosing allows the manipulation, suppression and reversal of antibiotic drug resistance *in vitro*. Nat Commun 8:1–11.

13. Marchant J. 2018. When antibiotics turn toxic. Nature 555:431–433.

14. Wistrand-Yuen E, Knopp M, Hjort K, Koskiniemi S, Berg OG, Andersson DI. 2018. Evolution of high-level resistance during low-level antibiotic exposure. Nat Commun 9:1599.

15. Kohanski MA, DePristo MA, Collins JJ. 2010. Sublethal Antibiotic Treatment Leads to Multidrug Resistance via Radical-Induced Mutagenesis. Mol Cell 37:311–320.

16. Andersson DI, Hughes D. 2012. Evolution of antibiotic resistance at non-lethal drug concentrations. Drug Resist Updat 15:162–172.

17. Strauss SK, Schirman D, Jona G, Brooks AN, Kunjapur AM, Nguyen Ba AN, Flint A, Solt A, Mershin A, Dixit A, Yona AH, Csörgő B, Busby BP, Hennig BP, Pál C, Schraivogel D, Schultz D, Wernick DG, Agashe D, Levi D, Zabezhinsky D, Russ D, Sass E, Tamar E, Herz E, Levy ED, Church GM, Yelin I, Nachman I, Gerst JE, Georgeson JM, Adamala KP, Steinmetz LM, Rübsam M, Ralser M, Klutstein M, Desai MM, Walunjkar N, Yin N, Hefetz NA, Jakimo N, Snitser O, Adini O, Kumar P, Smith RSH, Zean R, Hazan R, Rak R, Kishony R, Johnson S, Nouriel S, Vonesch SC, Foster S, Dagan T, Wein T, Karydis T, Wannier TM, Stiles T, Olin-Sandoval V, Mueller WF, Bar-On YM, Dahan O, Pilpel Y. 2019. Evolthon: A community endeavor to evolve lab evolution. PLoS Biol 17.

18. Russ D, Glaser F, Shaer Tamar E, Yelin I, Baym M, Kelsic ED, Zampaloni C, Haldimann A, Kishony R. 2020. Escape mutations circumvent a tradeoff between resistance to a beta-lactam and resistance to a beta-lactamase inhibitor. *Nat Commun* 11:1–9.
19. Reding C, Catalán P, Jansen G, Bergmiller T, Rosenstiel P, Schulenburg H, Gudelj I, Beardmore R. 2019. Hotspot Dosages of Most Rapid Antibiotic Resistance Evolution. *bioRxiv* 866269.
20. Delcour AH. 2009. Outer Membrane Permeability and Antibiotic Resistance. *Biochim Biophys Acta* 1794:808–816.
21. Blair JMA, Webber MA, Baylay AJ, Ogbolu DO, Piddock LJ V. 2015. Molecular mechanisms of antibiotic resistance. *Nat Rev Micro* 13:42–51.
22. Li X-Z, Plésiat P, Nikaido H. 2015. The Challenge of Efflux-Mediated Antibiotic Resistance in Gram-Negative Bacteria. *Clin Microbiol Rev* 28:337–418.
23. Kobyłka J, Kuth MS, Müller RT, Geertsma ER, Pos KM. 2020. AcrB: a mean, keen, drug efflux machine. *Ann N Y Acad Sci* 1459:38–68.
24. Nikaido H, Takatsuka Y. 2009. Mechanisms of RND Multidrug Efflux Pumps. *Biochim Biophys Acta* 1794:769–781.
25. Langevin AM, Dunlop MJ. 2018. Stress introduction rate alters the benefit of AcrAB-TolC efflux pumps. *J Bacteriol* 200.
26. Okusu H, Ma D, Nikaido H. 1996. AcrAB efflux pump plays a major role in the antibiotic resistance phenotype of *Escherichia coli* multiple-antibiotic-resistance (Mar) mutants. *J Bacteriol* 178:306–308.
27. Zwama M, Yamasaki S, Nakashima R, Sakurai K, Nishino K, Yamaguchi A. 2018. Multiple entry pathways within the efflux transporter AcrB contribute to multidrug

recognition. Nat Commun 9:1–9.

28. Webber MA, Talukder A, Piddock LJV. 2005. Contribution of mutation at amino acid 45 of AcrR to *acrB* expression and ciprofloxacin resistance in clinical and veterinary *Escherichia coli* isolates. Antimicrob Agents Chemother 49:4390–4392.
29. Olliver A, Vallé M, Chaslus-Dancla E, Cloeckaert A. 2004. Role of an *acrR* mutation in multidrug resistance of *in vitro*-selected fluoroquinolone-resistant mutants of *Salmonella enterica* serovar Typhimurium. FEMS Microbiol Lett 238:267–272.
30. Wang H, Dzink-Fox JL, Chen M, Levy SB. 2001. Genetic characterization of highly fluoroquinolone-resistant clinical *Escherichia coli* strains from China: Role of *acrR* mutations. Antimicrob Agents Chemother 45:1515–1521.
31. Baym M, Lieberman TD, Kelsic ED, Chait R, Gross R, Yelin I, Kishony R. 2016. Spatiotemporal microbial evolution on antibiotic landscapes. Science 353:1147–1151.
32. El Meouche I, Dunlop MJ. 2018. Heterogeneity in efflux pump expression predisposes antibiotic-resistant cells to mutation. Science 362:686 LP – 690.
33. Lukačišinová M, Fernando B, Bollenbach T. 2020. Highly parallel lab evolution reveals that epistasis can curb the evolution of antibiotic resistance. Nat Commun 11:3105.
34. Wong BG, Mancuso CP, Kiriakov S, Bashor CJ, Khalil AS. 2018. Precise, automated control of conditions for high-throughput growth of yeast and bacteria with eVOLVER. Nat Biotechnol 36:614.
35. Sood S. 2016. Chloramphenicol - A Potent Armament Against Multi-Drug Resistant (MDR) Gram Negative Bacilli? J Clin Diagn Res 2016/02/01. 10:DC01-DC3.
36. Nitzan O, Kennes Y, Colodner R, Saliba W, Edelstein I H, Raz R, Chazan B. 2015. Chloramphenicol use and susceptibility patterns in Israel: a national survey. Isr Med

Assoc J 17:27–31.

37. Ruiz C, Levy SB. 2013. Regulation of *acrAB* expression by cellular metabolites in *Escherichia coli*. J Antimicrob Chemother 69:390–399.
38. Andersson DI, Balaban NQ, Baquero F, Courvalin P, Glaser P, Gophna U, Kishony R, Molin S, Tønjum T. 2020. Antibiotic resistance: turning evolutionary principles into clinical reality. FEMS Microbiol Rev.
39. Mcmurry LM, Levy SB. 2013. Amino acid residues involved in inactivation of the *Escherichia coli* multidrug resistance repressor MarR by salicylate, 2,4-dinitrophenol, and plumbagin. FEMS Microbiol Lett. NIH Public Access.
40. Grenier F, Matteau D, Baby V, Rodrigue S. 2014. Complete genome sequence of *Escherichia coli* BW25113. Genome Announc 2.
41. Hobbs EC, Yin X, Paul BJ, Astarita JL, Storz G. 2012. Conserved small protein associates with the multidrug efflux pump AcrB and differentially affects antibiotic resistance. Proc Natl Acad Sci U S A 109:16696–16701.
42. Daley DO, Rapp M, Granseth E, Melén K, Drew D, Von Heijne G. 2005. Global topology analysis of the *Escherichia coli* inner membrane proteome. Science 308:1321–1323.
43. Lopes BS, Amyes SGB. 2013. Insertion sequence disruption of *adeR* and ciprofloxacin resistance caused by efflux pumps and *gyrA* and *parC* mutations in *Acinetobacter baumannii*. Int J Antimicrob Agents 41:117–121.
44. Cannatelli A, D’Andrea MM, Giani T, Di Pilato V, Arena F, Ambretti S, Gaibani P, Rossolini GM. 2013. *In vivo* emergence of colistin resistance in *Klebsiella pneumoniae* producing KPC-type carbapenemases mediated by insertional inactivation of the PhoQ/PhoP *mgrB* regulator. Antimicrob Agents Chemother 57:5521–5526.

45. Durrant M, Li MM, Siranosian B, Bhatt AS. 2019. Mobile genetic element insertions drive antibiotic resistance across pathogens. *bioRxiv* 527788.
46. Praski Alzrigat L, Huseby DL, Brandis G, Hughes D. 2017. Fitness cost constrains the spectrum of *marR* mutations in ciprofloxacin-resistant *Escherichia coli*. *J Antimicrob Chemother* 72:3016–3024.
47. Ray MJ, Tallman GB, Bearden DT, Elman MR, McGregor JC. 2019. Antibiotic prescribing without documented indication in ambulatory care clinics: national cross sectional study. *BMJ* 367:l6461.
48. Falagas ME, Makris GC, Dimopoulos G, Matthaiou DK. 2008. Heteroresistance: a concern of increasing clinical significance? *Clin Microbiol Infect* 14:101–104.
49. Hennessy TW, Petersen KM, Bruden D, Parkinson AJ, Hurlburt D, Getty M, Schwartz B, Butler JC. 2002. Changes in Antibiotic-Prescribing Practices and Carriage of Penicillin-Resistant *Streptococcus pneumoniae*: A Controlled Intervention Trial in Rural Alaska. *Clin Infect Dis* 34:1543–1550.
50. Čížman M. 2003. The use and resistance to antibiotics in the community. *Int J Antimicrob Agents*. Elsevier.
51. Kokwaro GO, Muchohi SN, Ogutu BR, Newton CRJC. 2006. Chloramphenicol pharmacokinetics in African children with severe malaria. *J Trop Pediatr* 52:239–243.
52. Baba T, Ara T, Hasegawa M, Takai Y, Okumura Y, Baba M, Datsenko KA, Tomita M, Wanner BL, Mori H. 2006. Construction of *Escherichia coli* K-12 in-frame, single-gene knockout mutants: the Keio collection. *Mol Syst Biol* 2.
53. Datta S, Costantino N, Court DL. 2006. A set of recombineering plasmids for gram-negative bacteria. *Gene* 379:109–115.

54. Datsenko KA, Wanner BL. 2000. One-step inactivation of chromosomal genes in *Escherichia coli* K-12 using PCR products. *Proc Natl Acad Sci U S A* 97:6640–6645.
55. Andrews JM. 2001. BSAC standardized disc susceptibility testing method. *J Antimicrob Chemother* 48:43–57.
56. Clinical and Laboratory Standards Institute. 2013. M100-S23 Performance Standards for Antimicrobial Susceptibility Testing; Twenty-Third Informational Supplement, 33rd ed. Wayne, PA.
57. Kronvall G. 1982. Analysis of a single reference strain for determination of gentamicin regression line constants and inhibition zone diameter breakpoints in quality control of disk diffusion antibiotic susceptibility testing. *J Clin Microbiol* 16:784–793.
58. Deatherage DE, Barrick JE. 2014. Identification of mutations in laboratory-evolved microbes from next-generation sequencing data using breseq. *Methods Mol Biol* 1151:165–188.

## FIGURE CAPTIONS

**Figure 1. Evolution experiment schematic.** We used the eVOLVER, a modular turbidostat, as an evolutionary platform to measure and record absorbance data at 600 nm ( $OD_{600}$ ). We calculated growth rate after each dilution event and collected samples at defined timepoints ( $t = 0, 1, 3, 6, 12, 24, 48, 72$  h). We performed antibiotic disc assays and spot assays for all samples.

**Figure 2. Temporal landscapes based on treatment concentration of chloramphenicol. (A)** Average growth rate. Growth rates are normalized to growth of strains at  $t = 0$  h; for raw data see Figure S1. Lighter areas represent growth rates closer to pre-treatment values; darker areas



represent reduced growth rates.  $MIC^0$  concentration is denoted with a bold dashed line for each strain (Figure S7). **(B)** Average resistance. Diameter of inhibition zones were plotted for each time and treatment. Smaller inhibition zones are shown in red and correspond to resistant cells ( $\leq 12$  mm) and larger inhibition zones are shown in blue and represent susceptible cells ( $\geq 19$  mm); intermediate inhibition is shown with color scale from orange to green.  $MIC^0$  is denoted with a bold dashed line. **(C)** Final resistance at 72 h based on treatment concentration normalized to  $MIC^0$ . The calculated  $MIC^f$  is based on data from Figure S6. Data points show the mean of three biological replicates. Shaded error bars show standard deviation.

**Figure 3. Resistance and Fitness Evolution Trajectories.** **(A)** Average diameter of inhibition zone and average growth rate plotted against each other. Lighter purple markers represent trajectories occurring earlier; darker purple are later timepoints. The longer the distance between markers, the greater the change between time points. **(B)** Schematics summarize patterns for each treatment concentration ( $xMIC^0$ ). Schematic plots show growth rate in terms of initial growth rate ( $GR_0$ ) and maximum physiological growth rate ( $GR_{max}$ ). Resistance is shown in terms of relative diameter of inhibition, where  $D_0$  is the diameter of inhibition at  $t = 0$  h and  $D_{min}$  is the diameter of the antibiotic disc.

**Figure 4. Number of Biological Replicates with Highly Resistant Sub-populations through Time.** Number of biological replicates that had a subpopulation greater than 5% of their total population, which could grow on LB plates containing **(A)** 10  $\mu\text{g/mL}$  or **(B)** 20  $\mu\text{g/mL}$  chloramphenicol. Raw data is shown in Figure S3 and data for each replicate at 72 h is shown in Figure S4. Initial populations contained  $\sim 10^7$  CFUs.  $MIC^0$  compared to treatment concentration

565 is denoted with a bold dashed line (Figure S7).

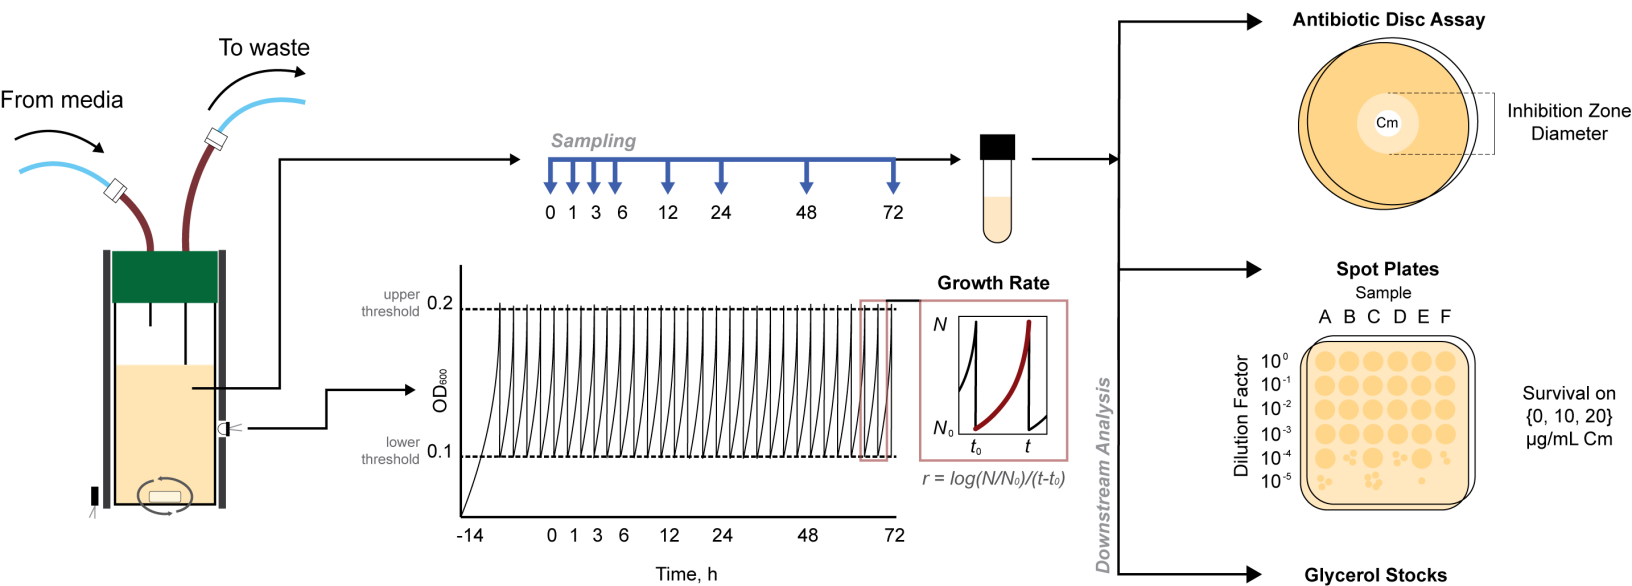

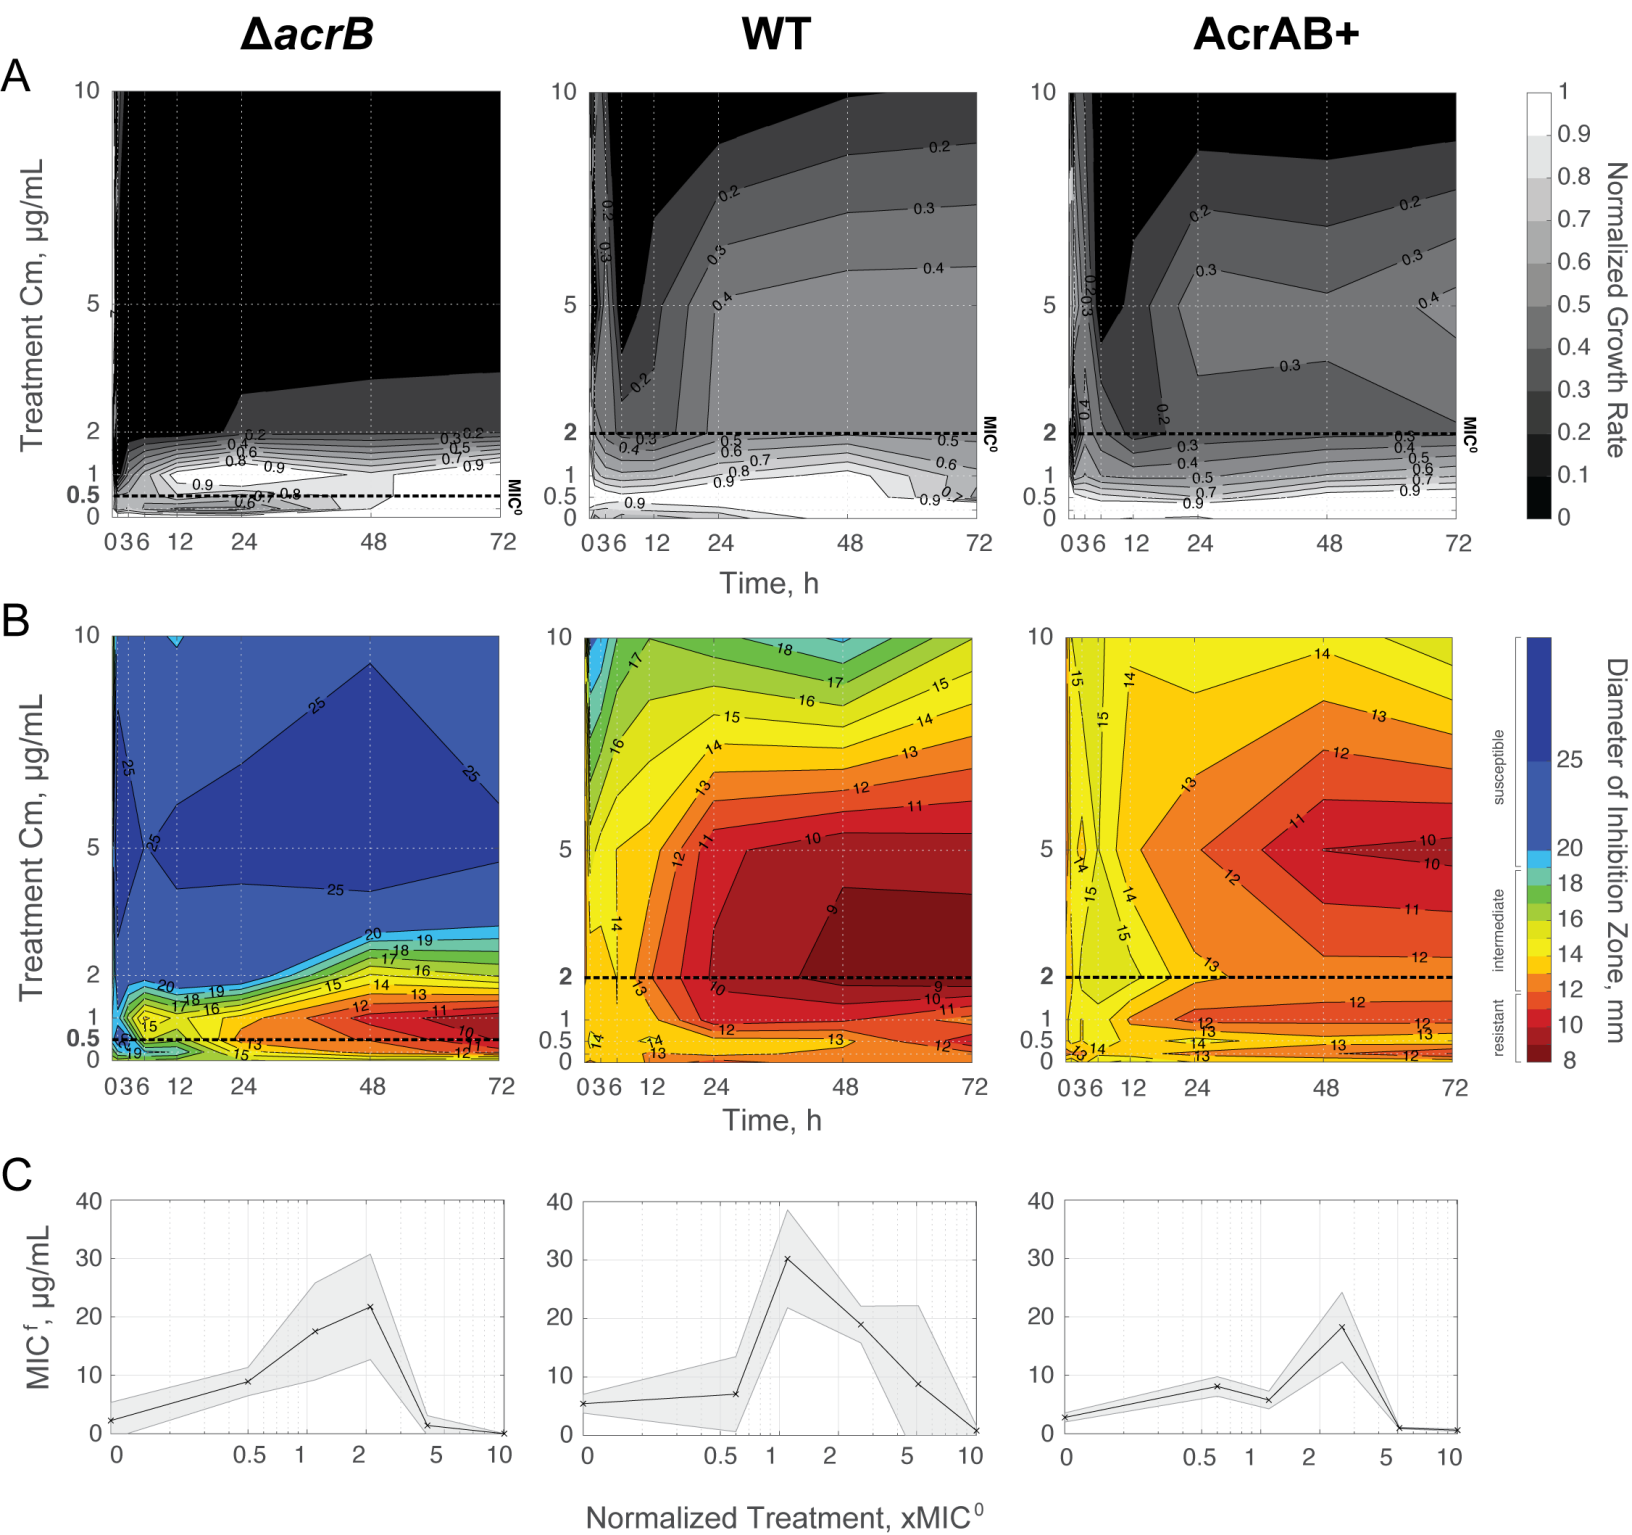

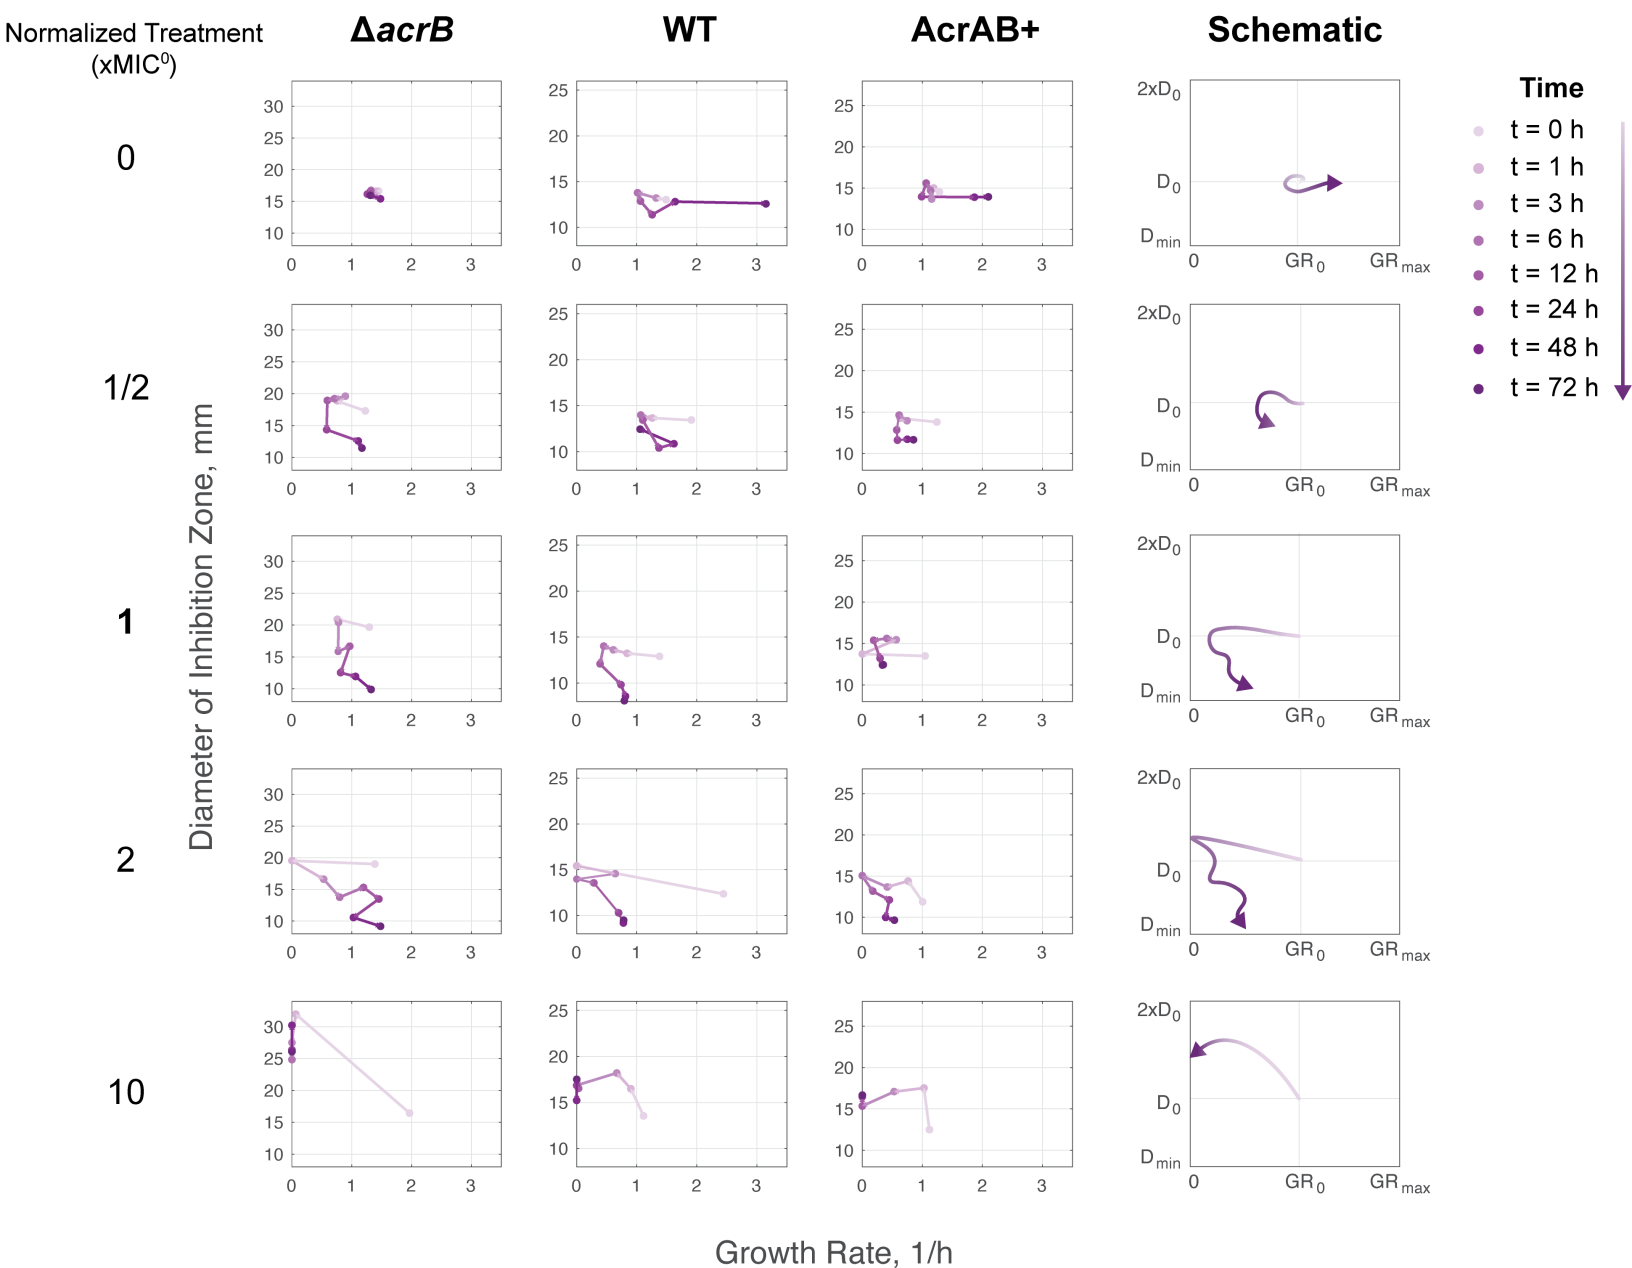

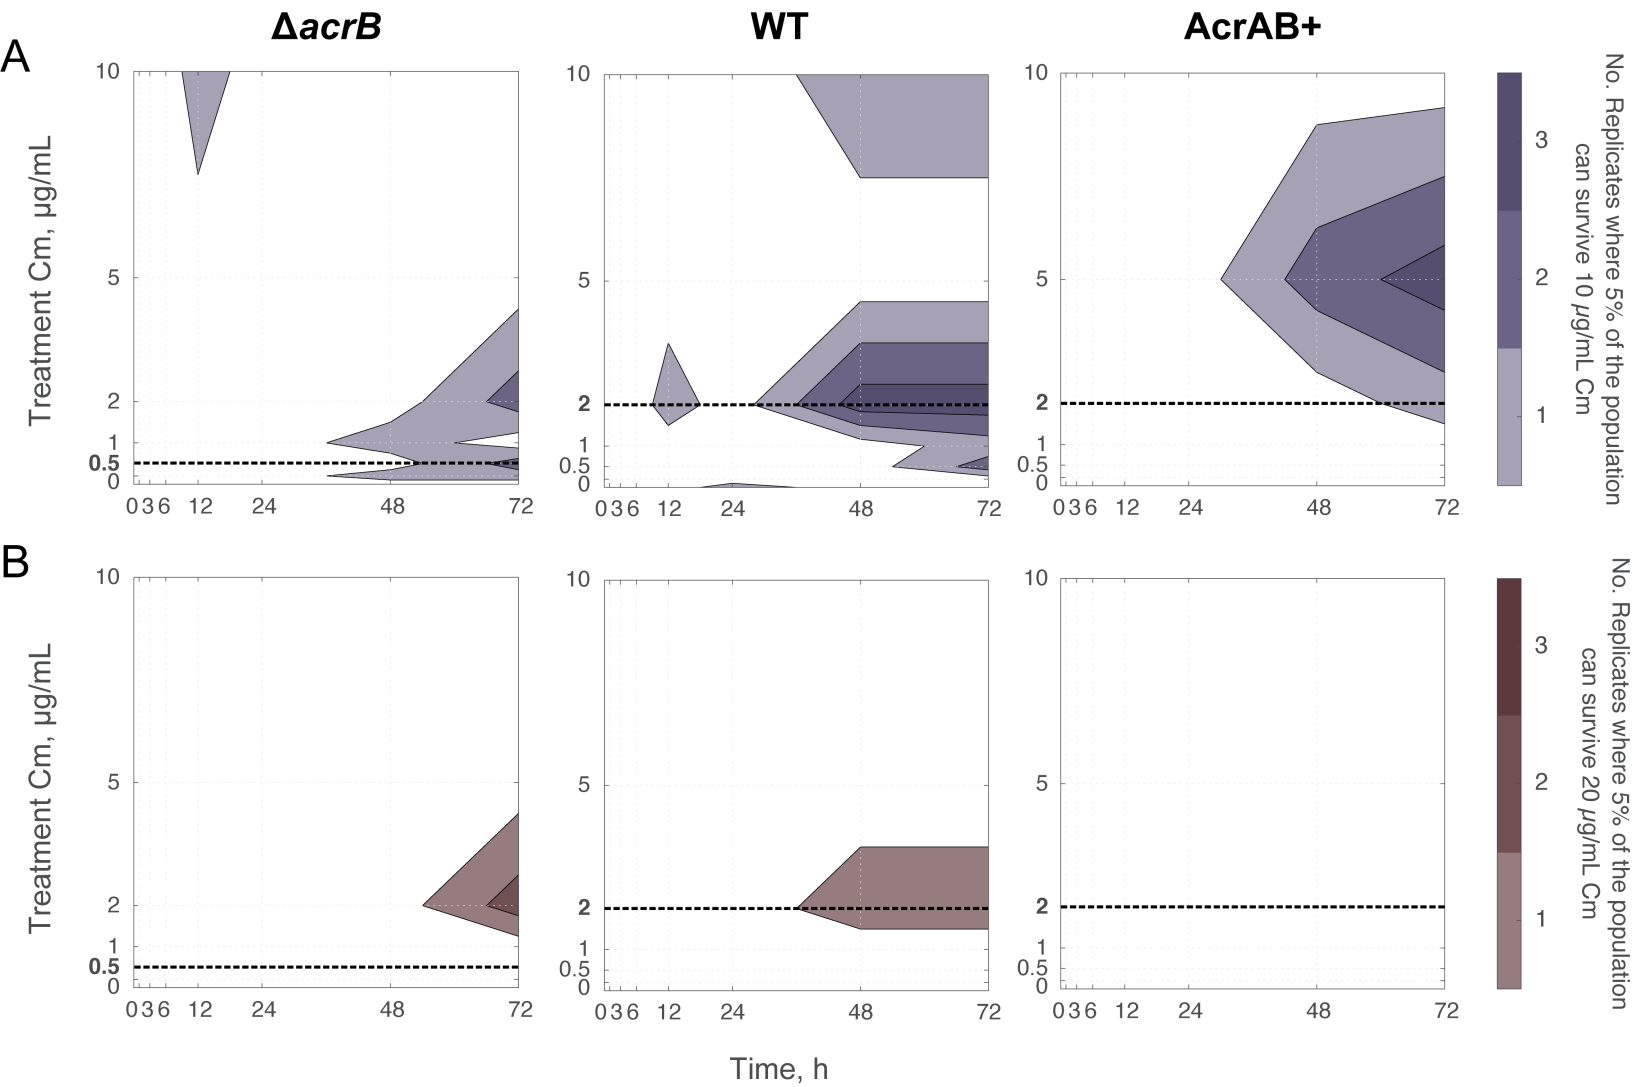

Source: http://biorxiv.org/cgi/reprint/2020.07.07.192856v1
