1 **Mapping the Role of Efflux Pumps in the Evolution of Antibiotic Resistance Reveals Near-**  
2 **MIC Treatments Facilitate Resistance Acquisition**

3

4 Ariel M. Langevin<sup>a,b</sup>, Imane El Meouche<sup>a,b,\*</sup>, Mary J. Dunlop<sup>a,b,#</sup>

5

6 <sup>a</sup> Department of Biomedical Engineering, Boston, Massachusetts, USA

7 <sup>b</sup> Biological Design Center, Boston, Massachusetts, USA

8

9 Running Head: Efflux pumps and resistance evolution

10

11 # Address correspondence to Mary J. Dunlop, [mjdunlop@bu.edu](mailto:mjdunlop@bu.edu)

12 \* Present address: Imane El Meouche, Université de Paris, IAME, UMR1137, INSERM, Paris,  
13 France

14

15 Word count of Abstract: 249

16 Word count of Manuscript: 4,141

17 **ABSTRACT**

18 Antibiotic resistance has become a major public health concern as bacteria evolve to evade  
19 drugs, leading to recurring infections and a decrease in antibiotic efficacy. Systematic efforts  
20 have revealed mechanisms involved in resistance; yet, in many cases, how these specific  
21 mechanisms accelerate or slow the evolution of resistance remains unclear. Here, we conducted a  
22 systematic study of the impact of the AcrAB-TolC efflux pump and its expression on the  
23 evolution of antibiotic resistance. We mapped how population growth rate and resistance change  
24 over time as a function of both the antibiotic concentration and the parent strain's genetic  
25 background. We compared strains lacking functional AcrAB-TolC efflux pumps, the wild type  
26 strain, and those overexpressing the pumps. In all cases, resistance emerged when cultures were  
27 treated with chloramphenicol concentrations near the MIC of the parent strain. Strains grown in  
28 concentrations just above the MIC were the most prone to evolving high levels of drug  
29 resistance, in some cases reaching values that far exceed the concentrations they were treated  
30 with. The genetic background of the parent strain also influenced resistance acquisition. The  
31 strain overexpressing pumps evolved resistance more slowly and at lower levels than the wild  
32 type strain or the strain lacking functional pumps. In contrast, the wild type strain rapidly  
33 achieved resistance through mutations in pump genes and their associated regulators. Overall,  
34 our results suggest that treatment conditions just above the MIC pose the largest risk for the  
35 evolution of resistance, and precise control of pump expression levels accelerates this process.

36

37 **IMPORTANCE**

38 Combatting the rise of antibiotic resistance is a significant challenge. Efflux pumps are an  
39 important contributor to drug resistance, and they exist across many cell types and can export

40 numerous classes of antibiotics. Cells with efflux pumps can regulate pump expression to  
41 maintain low intracellular drug concentrations. Here, we explored a three-dimensional  
42 evolutionary landscape, in which we mapped how resistance emerged depending on the  
43 antibiotic concentration, the presence of efflux pumps and their regulators, and time. We found  
44 that treatments just above the antibiotic concentration that inhibits growth of the parent strain  
45 were most likely to promote resistance, but that efflux pump levels influence the severity of these  
46 outcomes. These results indicate that there are specific treatment regimens and strain  
47 backgrounds that are especially problematic for the evolution of resistance.

48

## 49 **INTRODUCTION**

50 Despite the new wave of antibiotic discovery (1–5), bacteria continue to acquire resistance  
51 shortly after the introduction of new drugs for medicinal and industrial applications (6, 7). This is  
52 due in large part to the overuse of antibiotics, which results in pressures that drive resistance (8).  
53 With limited novel antibiotics and numerous futile antibiotics, doctors and scientists alike are  
54 presented with the challenge of how to best treat infections while keeping the evolution of  
55 resistance in check.

56

57 Adaptive evolution studies have begun exploring how certain antibiotic pressures influence the  
58 evolution of resistance. For instance, studies using a ‘morbidostat’—a continuous culture device  
59 that dynamically adjusts antibiotic concentrations to inhibitory levels—have found numerous  
60 targets that can be readily mutated to promote resistance (9–11), as well as identifying how drug  
61 switching can limit the evolution of resistance (12). While these studies have provided pivotal  
62 insights for this field, the morbidostat design causes antibiotic concentrations to rise to levels that

63 exceed clinically relevant concentrations due to toxicity for patients (13). In recognition of the  
64 drug concentration-dependent nature of evolution, researchers have begun to explore bacterial  
65 evolution under treatment conditions with lower antibiotic concentrations as well. Wistrand-  
66 Yuen *et al.* found that bacteria grown in sub-inhibitory drug concentrations were still able to  
67 achieve high levels of resistance (14–16). Notably, the study identified that the same antibiotic  
68 produced unique evolutionary pathways when cells were treated with sub-inhibitory  
69 concentrations as opposed to inhibitory concentrations (14).

70

71 One limitation of current studies within the field is that they can be difficult to compare due to  
72 variations in experimental parameters, such as species, antibiotics, or other experimental  
73 conditions (17). Given the unique evolutionary pathways at different antibiotic concentrations,  
74 systematic mapping of these evolutionary landscapes could provide an improved understanding  
75 of which conditions pose the highest risk by allowing direct comparisons between different  
76 antibiotic concentrations. For instance, evolution experiments that were conducted using a range  
77 of concentrations for beta-lactams (18) and erythromycin (19) have highlighted the  
78 concentration-dependent adaptability of *Escherichia coli*.

79

80 There are many mechanisms by which antibiotic resistance can be achieved, including enzymatic  
81 inactivation, alteration of antibiotic binding sites, and increased efflux or reduced influx of  
82 antibiotics (20, 21). Efflux pumps are omnipresent in prokaryotic and eukaryotic cells alike, and  
83 are an important contributor to multi-drug resistance (22). AcrAB-TolC in *E. coli* is a canonical  
84 example of a multi-drug efflux pump, providing broad-spectrum resistance and raising the MIC  
85 of at least nine different classes of antibiotics (23). The pump is composed of three types of

86 proteins: the outer membrane channel protein, TolC; the periplasmic linker protein, AcrA; and  
87 the inner membrane protein responsible for substrate recognition and export, AcrB (22). Using  
88 the proton motive force, AcrB actively exports antibiotics from the cell (22, 24). The presence of  
89 AcrAB-TolC efflux pumps can increase a strain's MIC from ~2-fold to ~10-fold, depending on  
90 the antibiotic (25–27). Furthermore, genes associated with these multi-drug resistant efflux  
91 pumps, including their local and global regulators, are common targets for mutation as strains  
92 evolve high levels of drug resistance (15, 28–31).

93

94 Recent studies have indicated that in addition to providing modest increases in the MIC due to  
95 drug export, pumps can also impact mutation rate and evolvability of strains, which may  
96 ultimately be more important for the acquisition of high levels of drug resistance. For example,  
97 heterogeneity in efflux pump expression can predispose subsets of bacterial populations to  
98 mutation even prior to antibiotic treatment (32). In addition, deleting genes associated with  
99 efflux pumps can also reduce evolvability under antibiotic exposure (33). These studies provoke  
100 the question of how efflux pumps, and their expression levels, can serve to promote or attenuate  
101 the evolution of drug resistance. To address this, we mapped the progression of resistance over  
102 time for strains with and without efflux pumps and their native regulator.

103

104 Our overall goal in this study was to identify how antibiotic resistance emerges based on the  
105 antibiotic concentration, the parent strain's genetic background, and the time since treatment. To  
106 achieve this, we used a turbidostat as an evolutionary platform (34) and treated cultures with a  
107 range of chloramphenicol concentrations. Chloramphenicol is often used as a last resort  
108 antibiotic in multi-drug resistant infections, as most clinical isolates are still susceptible to this

109 drug (35, 36). We measured the effect of various genetic backgrounds with different pump  
110 expression levels. We conducted these tests in a strain lacking functional AcrAB-TolC efflux  
111 pumps ( $\Delta$ *acrB*); in the wild type strain with the native regulatory network controlling AcrAB-  
112 TolC expression (WT); and in a strain with upregulated expression of the pumps (37), which  
113 lacks the local regulator AcrR (AcrAB<sup>+</sup>). We allowed the cultures to grow and evolve for 72 h in  
114 continuous culture while continuously recording growth rates. We periodically sampled the  
115 cultures and assessed the population's resistance. We then charted the evolutionary landscapes  
116 under different antibiotic concentrations, genetic backgrounds, and through time and identified  
117 which circumstances gave rise to resistance.

118

## 119 **RESULTS**

120 In order to systematically evaluate the evolutionary landscape of efflux pump-mediated  
121 antibiotic resistance, we used the eVOLVER, a modular turbidostat capable of growing  
122 independent cultures in parallel (34). This platform allowed us to track a culture's fitness by  
123 measuring growth rate continuously over multi-day experiments. In addition to this, we collected  
124 samples at selected intervals and, with these samples, performed antibiotic disc diffusion assays  
125 to assess the population's resistance and spot assays to quantify the presences of high-resistance  
126 isolates within the population (Figure 1).

127

128 We mapped growth rates over time for cultures subjected to a range of chloramphenicol  
129 treatment concentrations (Figure 2A & Figure S1). Treatment with high concentrations of  
130 chloramphenicol repressed bacterial growth for multiple days. We observed this growth  
131 inhibition for chloramphenicol concentrations  $>5x$  MIC<sup>0</sup>, where we define MIC<sup>0</sup> as the MIC of

132 the parent strain. Cultures grown in lower chloramphenicol concentrations were able to recover  
133 growth. For example, when we treated the bacterial populations with concentrations that were at  
134 or above  $MIC^0$  but below  $5x MIC^0$ , we observed a significant decrease in the growth rate  
135 between 0 and 12 h. However, after 12 to 24 h, growth in these populations was partially  
136 restored. Below  $MIC^0$ , cultures were able to grow, though usually at a deficit compared to  
137 conditions without chloramphenicol. Growth recovery results for the three strains ( $\Delta acrB$ , WT,  
138 and AcrAB+) were qualitatively similar when normalized by the  $MIC^0$  value. As such, complete  
139 growth inhibition occurred at a lower chloramphenicol concentration in the  $\Delta acrB$  strain than in  
140 WT or AcrAB+, although overall recovery patterns were similar.

141  
142 The growth rate results suggested the evolution of drug resistance within the population. To  
143 quantify this, we used an antibiotic disc assay to map the corresponding resistance levels (Figure  
144 2B & Figure S2). We found distinct increases in resistance levels that corresponded to  
145 populations which recovered growth. While there were qualitative similarities for the three  
146 strains, the timing and level of resistance achieved was dependent on the strain background. The  
147 WT strain was able to rapidly achieve high levels of resistance for a broad range of  
148 chloramphenicol treatment concentrations. Resistance generally emerged within 12-24 h for  
149 concentrations that ranged from below  $MIC^0$  up to  $5x MIC^0$ . In contrast, the  $\Delta acrB$  cells  
150 achieved resistance more slowly, but were ultimately able to reach levels of resistance  
151 comparable to the WT strain. Resistance acquisition for  $\Delta acrB$  occurred within a comparatively  
152 small range of chloramphenicol concentrations, centered just above  $MIC^0$ . The AcrAB+ strain,  
153 where efflux pumps are overexpressed, was able to evolve resistance, though this occurred more  
154 slowly and under a narrower range of treatment concentrations than in the WT strain.

155

156 To compare the ultimate resistance levels for the three strains, we calculated the final MIC of the  
157 populations at 72 h ( $MIC^f$ ). We found that treatments concentrations  $\sim 2x MIC^0$  produced the  
158 most resistant populations (Figure 2C). The selective pressures of sub-inhibitory antibiotic  
159 concentrations have often been considered high-risk for the evolution of resistance (14, 38). Yet,  
160 our results indicated that concentrations near or just above  $MIC^0$  lead to the highest resistance  
161 levels in these conditions. While the range of raw chloramphenicol values that support the  
162 evolution of resistance varied between the strains, when we normalized by  $MIC^0$ , AcrAB+ had  
163 the narrowest region of chloramphenicol concentrations that resulted in resistance. These results  
164 suggest that AcrAB+ has a reduced capacity to evolve resistance relative to the other strains.

165

166 We next asked how resistance and growth changed through time. We found that in the absence  
167 of antibiotics, the trajectories trended largely towards faster growth, with minimal changes to  
168 resistance levels (Figure 3). With sub- $MIC^0$  chloramphenicol treatment, we observed that the  
169 populations first experienced a slight growth decrease, followed by increased resistance, and then  
170 restored growth within 48 h. While these populations did gain resistance, they did not tend to  
171 reach very high  $MIC^f$  values. In contrast, at 1x and 2x  $MIC^0$  chloramphenicol treatment, there  
172 was a more dramatic reduction in growth within the first 12 h. Though growth was impacted, the  
173 populations tended to walk towards high resistance during this period. As depicted in the  
174 schematics, the zig-zag patterns trending towards high resistance may be indicative of the  
175 cultures acquiring resistant mutations and compensating for the associated fitness costs of these  
176 mutations. Finally, bacteria treated with 10x  $MIC^0$  first became more susceptible and then  
177 stopped growing entirely within 12 h; growth was never restored for these populations. We



178 found that strains from all three genetic backgrounds followed similar evolutionary trajectories  
179 while balancing the trade-off between growth and resistance. These findings highlight the  
180 importance of using antibiotic concentrations that are sufficiently inhibitory.

181

182 While these results tell us about the growth rate and resistance of the overall population, it is  
183 difficult to determine if sub-populations of cells within the culture have acquired high levels of  
184 resistance from disc assays alone. First, because the disc assays do not quantify resistance  
185 associated with individual cells in the culture, they cannot reveal the presence of subpopulations  
186 of resistant and susceptible cells. Second, beyond a certain resistance level, cells will grow up to  
187 the boundary of the disc; thus, it is not possible to quantify resistance increases beyond this.  
188 Determining which conditions can give rise to high levels of resistance is important for revealing  
189 particularly dangerous treatment regimes. In addition, sub-populations with increased resistance  
190 to one antibiotic can promote cross-resistance to other drugs (38).

191

192 To quantify the fraction of resistant cells that emerged during our evolution experiment, we  
193 conducted a spot assay, in which we measured the fraction of the population capable of surviving  
194 on specific chloramphenicol concentrations. For all three strains, we observed sub-populations  
195 that were capable of growing on 10  $\mu\text{g}/\text{mL}$  chloramphenicol (Figure 4A & Figure S3).  
196 Interestingly, these cells primarily emerged from treatment conditions with lower levels of  
197 chloramphenicol, and not from conditions where cells were subjected to 10  $\mu\text{g}/\text{mL}$   
198 chloramphenicol. For example, over 5% of the population from each of the three WT replicates  
199 that were treated at 2  $\mu\text{g}/\text{mL}$  chloramphenicol could survive on 10  $\mu\text{g}/\text{mL}$  at the end of the  
200 experiment. We did find cases where WT cells treated with 10  $\mu\text{g}/\text{mL}$  evolved resistance to 10

201  $\mu\text{g/mL}$ , however this was less common than in treatments near  $\text{MIC}^0$ . Thus, cultures were able to  
202 evolve resistance to higher levels of chloramphenicol than they were subjected to, a feature that  
203 was most pronounced when treatments were just above or at  $\text{MIC}^0$ . These results closely match  
204 trends in the population's overall resistance (Figure 2B). We also found isolates capable of  
205 growing on 20  $\mu\text{g/mL}$  chloramphenicol, with a reduced frequency relative to 10  $\mu\text{g/mL}$  (Figure  
206 4B & Figure S3-S4).

207

208 Interestingly, the  $\Delta\text{acrB}$  strain consistently produced sub-populations that were able to grow at  
209 20  $\mu\text{g/mL}$  (or 40x  $\text{MIC}^0$ ) chloramphenicol by 72 h. This sub-population appeared for  
210 chloramphenicol concentrations around 2  $\mu\text{g/mL}$ . WT results followed a similar trend, with  
211 resistance to both 10 and 20  $\mu\text{g/mL}$  chloramphenicol evolving by 72 h. In contrast, the AcrAB+  
212 strain was capable of evolving resistance to 10  $\mu\text{g/mL}$  when treated with chloramphenicol  
213 concentrations slightly above  $\text{MIC}^0$ ; yet, AcrAB+ never produced a sub-population that was able  
214 to grow on 20  $\mu\text{g/mL}$  as the other strains did. These results were consistent with our findings that  
215 AcrAB+ is less prone to evolve high levels of resistance than the  $\Delta\text{acrB}$  or the WT strains are.

216

217 A key question remained: which mutations were responsible for the increases in resistance we  
218 observed? To address this, we used whole genome sequencing to analyze three biological  
219 replicates from the 72 h timepoint for the WT strain (Figure S5). All of the sequenced isolates  
220 had a point mutation in the DNA binding region of *marR*, which can upregulate AcrAB-TolC  
221 efflux pumps and expression of other stress response genes (39). Additionally, two isolates had  
222 an IS1 or IS5 insertional sequence interrupting *acrR*, which would upregulate *acrAB* (40). The  
223 other isolate had a single point mutation in a periplasmic encoding region of *acrB*, in close

224 proximity to a site found to aid in chloramphenicol resistance (41, 42). These sequencing results  
225 indicate that strains containing AcrAB-TolC efflux pumps use mutations related to the pumps  
226 and their regulation to optimize survival and increase resistance in the presence of antibiotics.

227

## 228 **DISCUSSION**

229 In this work, we identified that treating strains with antibiotic concentrations close to MIC<sup>0</sup> is  
230 problematic for the evolution of resistance; however, the evolvability and ultimate resistance  
231 level achieved depend heavily on the genetic background. For  $\Delta$ *acrB*, WT, and AcrAB+ strains,  
232 we observed some common features between the evolutionary landscapes, where reductions in  
233 growth rate were followed by increases in resistance. Yet, despite qualitative similarities, the  
234 degree to which these strains became resistant depended on the presence of AcrAB-TolC efflux  
235 pumps. WT bacterial populations with access to precise control of resistance machinery (i.e.  
236 efflux pumps and control of stress response regulators), evolved mutations that conferred high  
237 levels of resistance within 48 h after antibiotic exposure. The three biological replicates  
238 developed similar mutations in *marR*, *acrR*, and *acrB* to upregulate AcrAB-TolC efflux pumps  
239 in the WT strain, resulting in a population capable of surviving 10x MIC<sup>0</sup> chloramphenicol  
240 treatment. These results are consistent with findings from drug resistance studies that have  
241 identified point mutations and insertional sequences in regulators that serve to upregulate efflux  
242 pumps (11, 24, 43–45). Notably, AcrAB+, which overexpresses efflux pumps, was less  
243 evolvable and never achieved as high levels of resistance as the WT strain, suggesting that both  
244 having pumps and the ability to precisely control their expression together are important in the  
245 evolution of resistance. This reduced evolvability of AcrAB+ may be a result of the fitness  
246 burden of constitutive pump overexpression (25, 46). In contrast, we found that under certain

247 conditions the  $\Delta acrB$  strain evolved to survive on 40x MIC<sup>0</sup>. This phenomenon agrees with  
248 results by Cudkowicz & Schuldiner, who found that evolving  $\Delta acrB$  produced a more resistant  
249 population than evolving WT. They showed that the  $\Delta acrB$  strain gained high resistance by  
250 optimizing redundant efflux pumps in *E. coli*, such as AcrEF and MdtEF (11). Taken together,  
251 these findings suggest that carefully modulating the exact levels of pump expression may be  
252 critical for evolving resistance.

253

254 Our results identify antibiotic treatment regimes that are especially prone to mutation. While  
255 doctors measure resistance of bacterial infections, they sometimes prescribe antibiotic treatment  
256 prior to obtaining the results of this assay (47) or use a treatment concentration too low to  
257 effectively penetrate an infection site (48). This blind treatment could lead to increased levels of  
258 resistance (49, 50). Yet, potentially more dangerous are the differences between the simulated  
259 plasma-concentration and measured plasma-concentrations of patients. In a study at the Kenya  
260 Medical Research Institute, patients were administered a concentration of chloramphenicol well  
261 above the MIC for the *Streptococcus pneumoniae* being treated (51). Researchers simulated the  
262 administered dosing regime and later measured the plasma-concentration; their findings  
263 demonstrated that the true concentration of chloramphenicol in the patients was often 2-5x MIC,  
264 as opposed to the 5-10x MIC anticipated. These findings are relevant in that we found that *in*  
265 *vitro* chloramphenicol treatments under 10x MIC, especially 1-2x MIC treatments, most readily  
266 promote the emergence of highly resistant bacterial populations. Reding *et al.* similarly observed  
267 this hotspot for adaptability of *E. coli* in the presence of another antibiotic, erythromycin, just  
268 below its MIC (19). Although it is essential for healthcare workers to be mindful of toxicity and

269 accessibility, our results highlight the presence of regimes that are especially problematic and  
270 which should be avoided to limit evolution of antibiotic resistance.

271  
272 By charting evolutionary landscapes across different antibiotic concentrations, different parent  
273 strains, and time, we have gained insight into treatments that impact the emergence of antibiotic  
274 resistance and the role of efflux pumps in this process.

275

## 276 **METHODS**

### 277 **Strains and Plasmids**

278 We used *E. coli* strains BW25113 (WT), BW25113  $\Delta$ *acrB* ( $\Delta$ *acrB*), and BW25113  $\Delta$ *acrR*  
279 (*AcrAB*<sup>+</sup>). The wild type strain BW25113 is the parent strain for the Keio collection (52).  
280 BW25113  $\Delta$ *acrB* was derived from Keio collection strain JW0451 (BW25113  $\Delta$ *acrB*::*kan*<sup>R</sup>)  
281 (25). For BW25113  $\Delta$ *acrR*, we designed primers with homology regions on *acrR* and amplified  
282 the kanamycin resistance marker and FRT sites of pKD13 (52). Primers are listed in Table S1.  
283 The linear DNA was then treated using a DpnI digest and PCR purification. We electroporated  
284 the purified linear DNA into competent BW25113 cells containing the plasmid pSIM6 (53). We  
285 removed kanamycin resistance markers following the pCP20 protocol from Reference (54).

286

### 287 **Determination of MIC**

288 For all experiments, overnight cultures were inoculated from a single colony in 10 mL LB and  
289 grown in a 50 mL Erlenmeyer flask at 37°C with 200 rpm orbital shaking. After overnight  
290 growth, the optical density at 600 nm (OD<sub>600</sub>) was measured, and the initial volume was diluted  
291 back to OD<sub>600</sub> = 0.1. To determine the MIC of the parent strains (Fig. S7), we added a final

292 concentration of 0, 0.2, 0.5, 1, 2, 4, 8, or 12  $\mu\text{g}/\text{mL}$  to each culture; to determine the MIC of the  
293 evolved strains (Fig. S6), we added 0, 0.5, 1, 2, 5, 10, 20, or 50  $\mu\text{g}/\text{mL}$  to each culture. The  
294 samples were sealed with evaporation-limiting membranes (Thermo Scientific AB-0580) and  
295 grown in 24-well plates at  $37^\circ\text{C}$  with 200 rpm orbital shaking.  $\text{OD}_{600}$  readings were taken using a  
296 BioTek Synergy H1m plate reader before incubation ( $t = 0$  h) and after antibiotic exposure ( $t =$   
297 24 h). All experiments were performed in triplicate using biological replicates.

298

### 299 **Experimental Conditions in the eVOLVER**

300 In the eVOLVER, cultures were inoculated from a single colony in LB at  $37^\circ\text{C}$ . A stir bar mixed  
301 the cultures on a medium setting, or approximately 1000 rpm (34). The LB was supplemented  
302 with detergent Tween20 (Sigma Aldrich Cat. # P1379) at 0.2% (v/v) to reduce spurious  $\text{OD}_{600}$   
303 measurements caused by biofilm growth on the flask.

304

305 Cells were inoculated in the eVOLVER overnight ( $t \approx -16 - -14$  h) prior to the beginning of the  
306 experiment ( $t = 0$  h) to establish steady-state exponential growth. We set the eVOLVER using an  
307 upper  $\text{OD}_{600}$  bound of 0.2 and a lower bound of 0.1; thus, cultures were grown to a turbidity of  
308 0.2 and then diluted back to 0.1 to maintain the turbidostat at approximately constant cell  
309 density. Samples were collected during the experiment at set time points ( $t = 0, 1, 3, 6, 12, 24,$   
310 48, and 72 h) and used for downstream analysis. All experiments were performed in triplicate  
311 using biological replicates.

312

313 At  $t = 0$  h, we introduced chloramphenicol at a predetermined final treatment concentration  
314 ( $[\text{Cm}] = 0, 0.2, 0.5, 1, 2, 5, 10, \text{ or } 20 \mu\text{g}/\text{mL}$ ). This introduction was implemented by switching

315 the media source from one containing 0 µg/mL chloramphenicol to another containing the final  
316 treatment concentration; in addition, we spiked the samples directly with the treatment  
317 concentration of chloramphenicol at the same time to avoid a delay due to the time required for  
318 media cycling in the turbidostat.

319

## 320 **Downstream Assays and Data Collection from eVOLVER Samples**

### 321 Growth Rate Measurements

322 Growth rate measurements were calculated after each dilution event using:

$$\text{Growth Rate} = \frac{\ln\left(\frac{OD_{600,high}}{OD_{600,low}}\right)}{t_{OD_{600,high}} - t_{OD_{600,low}}}$$

323 The growth rate between each dilution was then averaged across sampling time points to  
324 compare against disc diffusion assays and spot assays. For example, the growth rate given at t =  
325 0 h is the growth rate from t = -6 h to t = 0 h.

326

### 327 Antibiotic Disc Diffusion Assay

328 We aliquoted samples from the eVOLVER, where the OD<sub>600</sub> from each sample was between 0.1  
329 and 0.2. We used cotton swabs to cover LB agar plates with a layer of the sample (55). An  
330 antibiotic disc containing chloramphenicol (30 g) (Thermo Fisher Scientific Cat. # CT0013B)  
331 was then placed on the plate. The plate was incubated for 24 h at 37°C. The diameter of the zone  
332 of inhibition around each disc was then measured. Diameter of inhibition zones were classified  
333 as susceptible, intermediate, or resistant based on Reference (56). Additionally, we calculated the  
334 MIC using a linear mapping between MIC and diameter of inhibition zones for our samples  
335 (Figure S6) (57).

336

### 337 Spot Assay

338 The samples from the eVOLVER experiment were diluted in PBS to the following dilution  
339 series: 1, 10<sup>-1</sup>, 10<sup>-2</sup>, 10<sup>-3</sup>, 10<sup>-4</sup>, and 10<sup>-5</sup>. We then plated 2.5 µL of each dilution on LB agar plates  
340 containing 0, 0.5, 1, 2, 5, 10, and 20 µg/mL chloramphenicol. The plates were then incubated for  
341 24 h at 37°C. To count colonies, we identified the dilution factor with the most countable  
342 colonies, and recorded the number of colony forming units (*CFU*) and dilution factor (*d*). The  
343 *CFU*/mL for each sample was then calculated by:

$$CFU/mL = \frac{CFU * d}{V}$$

344 where *V* is the volume plated. We also calculated the proportion of the population able to grow  
345 on different concentrations of chloramphenicol by calculating the *CFU*/mL from LB agar plates  
346 containing 0, 0.5, 1, 2, 5, 10, and 20 µg/mL chloramphenicol.

347

### 348 **Whole Genome Sequencing**

349 DNA was extracted from single isolates and parent strains using the QIAGEN DNeasy  
350 PowerBiofilm kit. Samples were sequenced at the Microbial Genome Sequencing Center (MiGS)  
351 in Pittsburg, PA, USA, who conducted library preparation based on the Illumina Nextera kit  
352 series and then sequenced using a NextSeq 550 platform with 150 bp paired-ends and an average  
353 coverage of 50 reads. We analyzed reads using *breseq* (58) version 0.35.1. Sequenced WT  
354 isolates were from experiments treated with 2 µg/mL chloramphenicol in the eVOLVER for 72 h  
355 and then isolated on 20 µg/mL chloramphenicol.

356

### 357 **Data Availability**



358 The datasets generated during this study are available from the corresponding author upon  
359 reasonable request.

360

## 361 **ACKNOWLEDGEMENTS**

362 This research was supported by the National Science Foundation (grant No. 1347635) and the  
363 National Institutes of Health (grant No. R01AI102922).

364

365 We thank Dr. Mo Khalil, Dr. Brandon Wong, Dr. Chris Mancuso, and Zack Heins for their  
366 assistance and support with the eVOLVER.

367

## 368 **REFERENCES**

- 369 1. Smith PA, Koehler MFT, Girgis HS, Yan D, Chen Y, Chen Y, Crawford JJ, Durk MR,  
370 Higuchi RI, Kang J, Murray J, Paraselli P, Park S, Phung W, Quinn JG, Roberts TC,  
371 Rougé L, Schwarz JB, Skippington E, Wai J, Xu M, Yu Z, Zhang H, Tan MW, Heise CE.  
372 2018. Optimized arylomycins are a new class of Gram-negative antibiotics. *Nature*  
373 561:189–194.
- 374 2. Sousa MC. 2019. New antibiotics target the outer membrane of bacteria. *Nature*. NLM  
375 (Medline).
- 376 3. Imai Y, Meyer KJ, Iinishi A, Favre-Godal Q, Green R, Manuse S, Caboni M, Mori M,  
377 Niles S, Ghiglieri M, Honrao C, Ma X, Guo JJ, Makriyannis A, Linares-Otoya L,  
378 Böhringer N, Wuisan ZG, Kaur H, Wu R, Mateus A, Typas A, Savitski MM, Espinoza JL,  
379 O'Rourke A, Nelson KE, Hiller S, Noinaj N, Schäberle TF, D'Onofrio A, Lewis K. 2019.  
380 A new antibiotic selectively kills Gram-negative pathogens. *Nature* 576:459–464.

- 381 4. Hart EM, Mitchell AM, Konovalova A, Grabowicz M, Sheng J, Han X, Rodriguez-Rivera  
382 FP, Schwaid AG, Malinverni JC, Balibar CJ, Bodea S, Si Q, Wang H, Homsher MF,  
383 Painter RE, Ogawa AK, Sutterlin H, Roemer T, Black TA, Rothman DM, Walker SS,  
384 Silhavy TJ. 2019. A small-molecule inhibitor of BamA impervious to efflux and the outer  
385 membrane permeability barrier. *Proc Natl Acad Sci U S A* 116:21748–21757.
- 386 5. Luther A, Urfer M, Zahn M, Müller M, Wang SY, Mondal M, Vitale A, Hartmann JB,  
387 Sharpe T, Monte F Lo, Kocherla H, Cline E, Pessi G, Rath P, Modaresi SM, Chiquet P,  
388 Stiegeler S, Verbree C, Remus T, Schmitt M, Kolopp C, Westwood MA, Desjonquères N,  
389 Brabet E, Hell S, LePoupon K, Vermeulen A, Jaisson R, Rithié V, Upert G, Lederer A,  
390 Zbinden P, Wach A, Moehle K, Zerbe K, Locher HH, Bernardini F, Dale GE, Eberl L,  
391 Wollscheid B, Hiller S, Robinson JA, Obrecht D. 2019. Chimeric peptidomimetic  
392 antibiotics against Gram-negative bacteria. *Nature* 576:452–458.
- 393 6. Davies J, Davies D. 2010. Origins and Evolution of Antibiotic Resistance. *Microbiol Mol*  
394 *Biol Rev* 74:417–433.
- 395 7. England PH. 2015. Health Matter – tackling antimicrobial resistance. GOVUK.
- 396 8. Ventola CL. 2015. The Antibiotic Resistance Crisis: Part 1: Causes and Threats. *Pharm*  
397 *Ther* 40:277–283.
- 398 9. Toprak E, Veres A, Yildiz S, Pedraza JM, Chait R, Paulsson J, Kishony R. 2013. Building  
399 a morbidostat: An automated continuous-culture device for studying bacterial drug  
400 resistance under dynamically sustained drug inhibition. *Nat Protoc* 8:555–567.
- 401 10. Toprak E, Veres A, Michel J-B, Chait R, Hartl DL, Kishony R. 2011. Evolutionary paths  
402 to antibiotic resistance under dynamically sustained drug selection. *Nat Genet* 44:101.
- 403 11. Alon Cudkowicz N, Schuldiner S. 2019. Deletion of the major *Escherichia coli* multidrug

- 404 transporter AcrB reveals transporter plasticity and redundancy in bacterial cells. PLoS  
405 One 14:e0218828.
- 406 12. Yoshida M, Reyes SG, Tsuda S, Horinouchi T, Furusawa C, Cronin L. 2017. Time-  
407 programmable drug dosing allows the manipulation, suppression and reversal of antibiotic  
408 drug resistance *in vitro*. Nat Commun 8:1–11.
- 409 13. Marchant J. 2018. When antibiotics turn toxic. Nature 555:431–433.
- 410 14. Wistrand-Yuen E, Knopp M, Hjort K, Koskiniemi S, Berg OG, Andersson DI. 2018.  
411 Evolution of high-level resistance during low-level antibiotic exposure. Nat Commun  
412 9:1599.
- 413 15. Kohanski MA, DePristo MA, Collins JJ. 2010. Sublethal Antibiotic Treatment Leads to  
414 Multidrug Resistance via Radical-Induced Mutagenesis. Mol Cell 37:311–320.
- 415 16. Andersson DI, Hughes D. 2012. Evolution of antibiotic resistance at non-lethal drug  
416 concentrations. Drug Resist Updat 15:162–172.
- 417 17. Strauss SK, Schirman D, Jona G, Brooks AN, Kunjapur AM, Nguyen Ba AN, Flint A,  
418 Solt A, Mershin A, Dixit A, Yona AH, Csörgő B, Busby BP, Hennig BP, Pál C,  
419 Schraivogel D, Schultz D, Wernick DG, Agashe D, Levi D, Zabezhinsky D, Russ D, Sass  
420 E, Tamar E, Herz E, Levy ED, Church GM, Yelin I, Nachman I, Gerst JE, Georgeson JM,  
421 Adamala KP, Steinmetz LM, Rübsam M, Ralser M, Klutstein M, Desai MM, Walunjkar  
422 N, Yin N, Hefetz NA, Jakimo N, Snitser O, Adini O, Kumar P, Smith RSH, Zean R,  
423 Hazan R, Rak R, Kishony R, Johnson S, Nouriel S, Vonesch SC, Foster S, Dagan T, Wein  
424 T, Karydis T, Wannier TM, Stiles T, Olin-Sandoval V, Mueller WF, Bar-On YM, Dahan  
425 O, Pilpel Y. 2019. Evolthon: A community endeavor to evolve lab evolution. PLoS Biol  
426 17.

- 427 18. Russ D, Glaser F, Shaer Tamar E, Yelin I, Baym M, Kelsic ED, Zampaloni C, Haldimann  
428 A, Kishony R. 2020. Escape mutations circumvent a tradeoff between resistance to a beta-  
429 lactam and resistance to a beta-lactamase inhibitor. *Nat Commun* 11:1–9.
- 430 19. Reding C, Catalán P, Jansen G, Bergmiller T, Rosenstiel P, Schulenburg H, Gudelj I,  
431 Beardmore R. 2019. Hotspot Dosages of Most Rapid Antibiotic Resistance Evolution.  
432 *bioRxiv* 866269.
- 433 20. Delcour AH. 2009. Outer Membrane Permeability and Antibiotic Resistance. *Biochim*  
434 *Biophys Acta* 1794:808–816.
- 435 21. Blair JMA, Webber MA, Baylay AJ, Ogbolu DO, Piddock LJ V. 2015. Molecular  
436 mechanisms of antibiotic resistance. *Nat Rev Micro* 13:42–51.
- 437 22. Li X-Z, Plésiat P, Nikaido H. 2015. The Challenge of Efflux-Mediated Antibiotic  
438 Resistance in Gram-Negative Bacteria. *Clin Microbiol Rev* 28:337–418.
- 439 23. Kobyłka J, Kuth MS, Müller RT, Geertsma ER, Pos KM. 2020. AcrB: a mean, keen, drug  
440 efflux machine. *Ann N Y Acad Sci* 1459:38–68.
- 441 24. Nikaido H, Takatsuka Y. 2009. Mechanisms of RND Multidrug Efflux Pumps. *Biochim*  
442 *Biophys Acta* 1794:769–781.
- 443 25. Langevin AM, Dunlop MJ. 2018. Stress introduction rate alters the benefit of AcrAB-  
444 TolC efflux pumps. *J Bacteriol* 200.
- 445 26. Okusu H, Ma D, Nikaido H. 1996. AcrAB efflux pump plays a major role in the antibiotic  
446 resistance phenotype of *Escherichia coli* multiple-antibiotic-resistance (Mar) mutants. *J*  
447 *Bacteriol* 178:306–308.
- 448 27. Zwama M, Yamasaki S, Nakashima R, Sakurai K, Nishino K, Yamaguchi A. 2018.  
449 Multiple entry pathways within the efflux transporter AcrB contribute to multidrug

- 450 recognition. *Nat Commun* 9:1–9.
- 451 28. Webber MA, Talukder A, Piddock LJV. 2005. Contribution of mutation at amino acid 45  
452 of AcrR to *acrB* expression and ciprofloxacin resistance in clinical and veterinary  
453 *Escherichia coli* isolates. *Antimicrob Agents Chemother* 49:4390–4392.
- 454 29. Olliver A, Vallé M, Chaslus-Dancla E, Cloeckaert A. 2004. Role of an *acrR* mutation in  
455 multidrug resistance of *in vitro*-selected fluoroquinolone-resistant mutants of *Salmonella*  
456 *enterica* serovar Typhimurium. *FEMS Microbiol Lett* 238:267–272.
- 457 30. Wang H, Dzink-Fox JL, Chen M, Levy SB. 2001. Genetic characterization of highly  
458 fluoroquinolone-resistant clinical *Escherichia coli* strains from China: Role of *acrR*  
459 mutations. *Antimicrob Agents Chemother* 45:1515–1521.
- 460 31. Baym M, Lieberman TD, Kelsic ED, Chait R, Gross R, Yelin I, Kishony R. 2016.  
461 Spatiotemporal microbial evolution on antibiotic landscapes. *Science* 353:1147–1151.
- 462 32. El Meouche I, Dunlop MJ. 2018. Heterogeneity in efflux pump expression predisposes  
463 antibiotic-resistant cells to mutation. *Science* 362:686 LP – 690.
- 464 33. Lukačišinová M, Fernando B, Bollenbach T. 2020. Highly parallel lab evolution reveals  
465 that epistasis can curb the evolution of antibiotic resistance. *Nat Commun* 11:3105.
- 466 34. Wong BG, Mancuso CP, Kiriakov S, Bashor CJ, Khalil AS. 2018. Precise, automated  
467 control of conditions for high-throughput growth of yeast and bacteria with eVOLVER.  
468 *Nat Biotechnol* 36:614.
- 469 35. Sood S. 2016. Chloramphenicol - A Potent Armament Against Multi-Drug Resistant  
470 (MDR) Gram Negative Bacilli? *J Clin Diagn Res* 2016/02/01. 10:DC01-DC3.
- 471 36. Nitzan O, Kennes Y, Colodner R, Saliba W, Edelstein I H, Raz R, Chazan B. 2015.  
472 Chloramphenicol use and susceptibility patterns in Israel: a national survey. *Isr Med*

- 473 Assoc J 17:27–31.
- 474 37. Ruiz C, Levy SB. 2013. Regulation of *acrAB* expression by cellular metabolites in  
475 *Escherichia coli*. J Antimicrob Chemother 69:390–399.
- 476 38. Andersson DI, Balaban NQ, Baquero F, Courvalin P, Glaser P, Gophna U, Kishony R,  
477 Molin S, Tønjum T. 2020. Antibiotic resistance: turning evolutionary principles into  
478 clinical reality. FEMS Microbiol Rev.
- 479 39. McMurry LM, Levy SB. 2013. Amino acid residues involved in inactivation of the  
480 *Escherichia coli* multidrug resistance repressor MarR by salicylate, 2,4-dinitrophenol, and  
481 plumbagin. FEMS Microbiol Lett. NIH Public Access.
- 482 40. Grenier F, Matteau D, Baby V, Rodrigue S. 2014. Complete genome sequence of  
483 *Escherichia coli* BW25113. Genome Announc 2.
- 484 41. Hobbs EC, Yin X, Paul BJ, Astarita JL, Storz G. 2012. Conserved small protein associates  
485 with the multidrug efflux pump AcrB and differentially affects antibiotic resistance. Proc  
486 Natl Acad Sci U S A 109:16696–16701.
- 487 42. Daley DO, Rapp M, Granseth E, Melén K, Drew D, Von Heijne G. 2005. Global topology  
488 analysis of the *Escherichia coli* inner membrane proteome. Science 308:1321–1323.
- 489 43. Lopes BS, Amyes SGB. 2013. Insertion sequence disruption of *adeR* and ciprofloxacin  
490 resistance caused by efflux pumps and *gyrA* and *parC* mutations in *Acinetobacter*  
491 *baumannii*. Int J Antimicrob Agents 41:117–121.
- 492 44. Cannatelli A, D’Andrea MM, Giani T, Di Pilato V, Arena F, Ambretti S, Gaibani P,  
493 Rossolini GM. 2013. *In vivo* emergence of colistin resistance in *Klebsiella pneumoniae*  
494 producing KPC-type carbapenemases mediated by insertional inactivation of the  
495 PhoQ/PhoP *mgrB* regulator. Antimicrob Agents Chemother 57:5521–5526.

- 496 45. Durrant M, Li MM, Siranosian B, Bhatt AS. 2019. Mobile genetic element insertions  
497 drive antibiotic resistance across pathogens. *bioRxiv* 527788.
- 498 46. Praski Alzrigat L, Huseby DL, Brandis G, Hughes D. 2017. Fitness cost constrains the  
499 spectrum of *marR* mutations in ciprofloxacin-resistant *Escherichia coli*. *J Antimicrob*  
500 *Chemother* 72:3016–3024.
- 501 47. Ray MJ, Tallman GB, Bearden DT, Elman MR, McGregor JC. 2019. Antibiotic  
502 prescribing without documented indication in ambulatory care clinics: national cross  
503 sectional study. *BMJ* 367:l6461.
- 504 48. Falagas ME, Makris GC, Dimopoulos G, Matthaïou DK. 2008. Heteroresistance: a  
505 concern of increasing clinical significance? *Clin Microbiol Infect* 14:101–104.
- 506 49. Hennessy TW, Petersen KM, Bruden D, Parkinson AJ, Hurlburt D, Getty M, Schwartz B,  
507 Butler JC. 2002. Changes in Antibiotic-Prescribing Practices and Carriage of Penicillin-  
508 Resistant *Streptococcus pneumoniae*: A Controlled Intervention Trial in Rural Alaska.  
509 *Clin Infect Dis* 34:1543–1550.
- 510 50. Čížman M. 2003. The use and resistance to antibiotics in the community. *Int J Antimicrob*  
511 *Agents*. Elsevier.
- 512 51. Kokwaro GO, Muchohi SN, Ogutu BR, Newton CRJC. 2006. Chloramphenicol  
513 pharmacokinetics in African children with severe malaria. *J Trop Pediatr* 52:239–243.
- 514 52. Baba T, Ara T, Hasegawa M, Takai Y, Okumura Y, Baba M, Datsenko KA, Tomita M,  
515 Wanner BL, Mori H. 2006. Construction of *Escherichia coli* K-12 in-frame, single-gene  
516 knockout mutants: the Keio collection. *Mol Syst Biol* 2.
- 517 53. Datta S, Costantino N, Court DL. 2006. A set of recombineering plasmids for gram-  
518 negative bacteria. *Gene* 379:109–115.

- 519 54. Datsenko KA, Wanner BL. 2000. One-step inactivation of chromosomal genes in  
520 *Escherichia coli* K-12 using PCR products. Proc Natl Acad Sci U S A 97:6640–6645.
- 521 55. Andrews JM. 2001. BSAC standardized disc susceptibility testing method. J Antimicrob  
522 Chemother 48:43–57.
- 523 56. Clinical and Laboratory Standards Institute. 2013. M100-S23 Performance Standards for  
524 Antimicrobial Susceptibility Testing; Twenty-Third Informational Supplement, 33rd ed.  
525 Wayne, PA.
- 526 57. Kronvall G. 1982. Analysis of a single reference strain for determination of gentamicin  
527 regression line constants and inhibition zone diameter breakpoints in quality control of  
528 disk diffusion antibiotic susceptibility testing. J Clin Microbiol 16:784–793.
- 529 58. Deatherage DE, Barrick JE. 2014. Identification of mutations in laboratory-evolved  
530 microbes from next-generation sequencing data using breseq. Methods Mol Biol  
531 1151:165–188.

532

### 533 **FIGURE CAPTIONS**

534 **Figure 1. Evolution experiment schematic.** We used the eVOLVER, a modular turbidostat, as  
535 an evolutionary platform to measure and record absorbance data at 600 nm ( $OD_{600}$ ). We  
536 calculated growth rate after each dilution event and collected samples at defined timepoints ( $t =$   
537 0, 1, 3, 6, 12, 24, 48, 72 h). We performed antibiotic disc assays and spot assays for all samples.

538

539 **Figure 2. Temporal landscapes based on treatment concentration of chloramphenicol. (A)**  
540 Average growth rate. Growth rates are normalized to growth of strains at  $t = 0$  h; for raw data see  
541 Figure S1. Lighter areas represent growth rates closer to pre-treatment values; darker areas



542 represent reduced growth rates.  $MIC^0$  concentration is denoted with a bold dashed line for each  
543 strain (Figure S7). **(B)** Average resistance. Diameter of inhibition zones were plotted for each  
544 time and treatment. Smaller inhibition zones are shown in red and correspond to resistant cells  
545 ( $\leq 12$  mm) and larger inhibition zones are shown in blue and represent susceptible cells ( $\geq 19$   
546 mm); intermediate inhibition is shown with color scale from orange to green.  $MIC^0$  is denoted  
547 with a bold dashed line. **(C)** Final resistance at 72 h based on treatment concentration normalized  
548 to  $MIC^0$ . The calculated  $MIC^f$  is based on data from Figure S6. Data points show the mean of  
549 three biological replicates. Shaded error bars show standard deviation.

550

551 **Figure 3. Resistance and Fitness Evolution Trajectories.** **(A)** Average diameter of inhibition  
552 zone and average growth rate plotted against each other. Lighter purple markers represent  
553 trajectories occurring earlier; darker purple are later timepoints. The longer the distance between  
554 markers, the greater the change between time points. **(B)** Schematics summarize patterns for  
555 each treatment concentration ( $xMIC^0$ ). Schematic plots show growth rate in terms of initial  
556 growth rate ( $GR_0$ ) and maximum physiological growth rate ( $GR_{max}$ ). Resistance is shown in  
557 terms of relative diameter of inhibition, where  $D_0$  is the diameter of inhibition at  $t = 0$  h and  $D_{min}$   
558 is the diameter of the antibiotic disc.

559

560 **Figure 4. Number of Biological Replicates with Highly Resistant Sub-populations through**  
561 **Time.** Number of biological replicates that had a subpopulation greater than 5% of their total  
562 population, which could grow on LB plates containing **(A)** 10  $\mu\text{g/mL}$  or **(B)** 20  $\mu\text{g/mL}$   
563 chloramphenicol. Raw data is shown in Figure S3 and data for each replicate at 72 h is shown in  
564 Figure S4. Initial populations contained  $\sim 10^7$  CFUs.  $MIC^0$  compared to treatment concentration

565 is denoted with a bold dashed line (Figure S7).

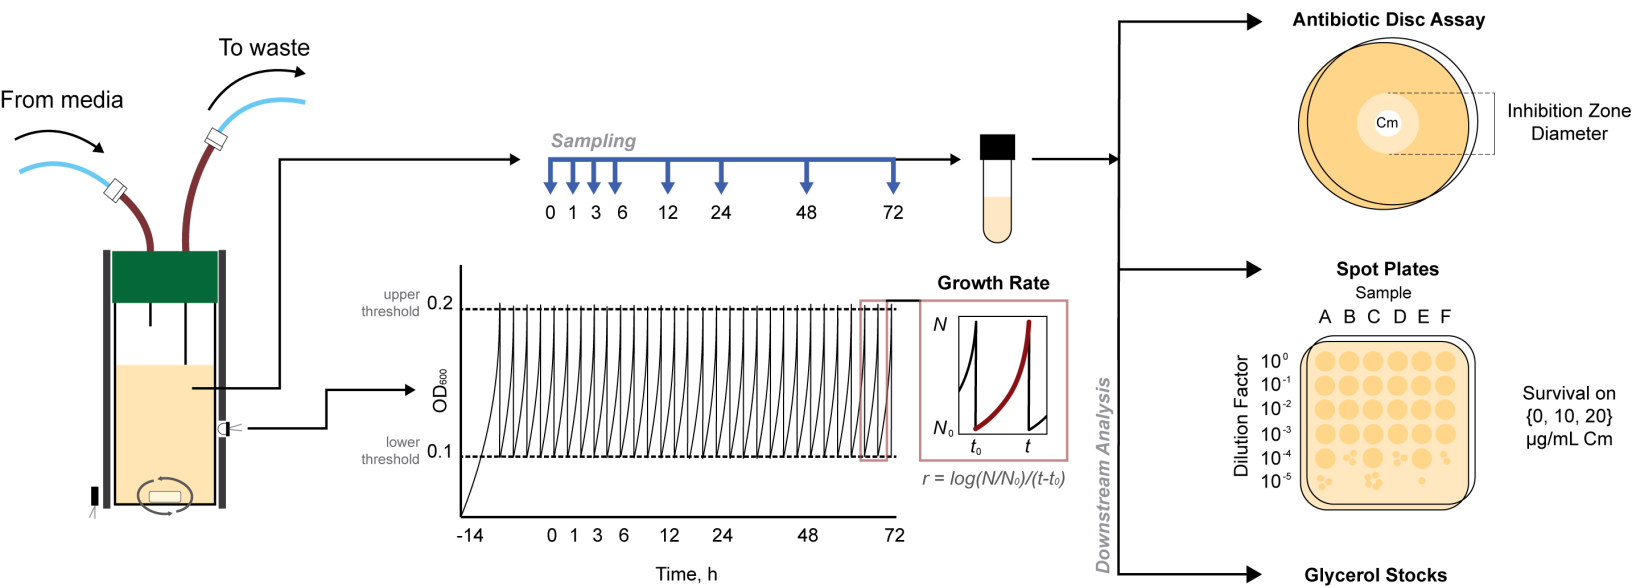

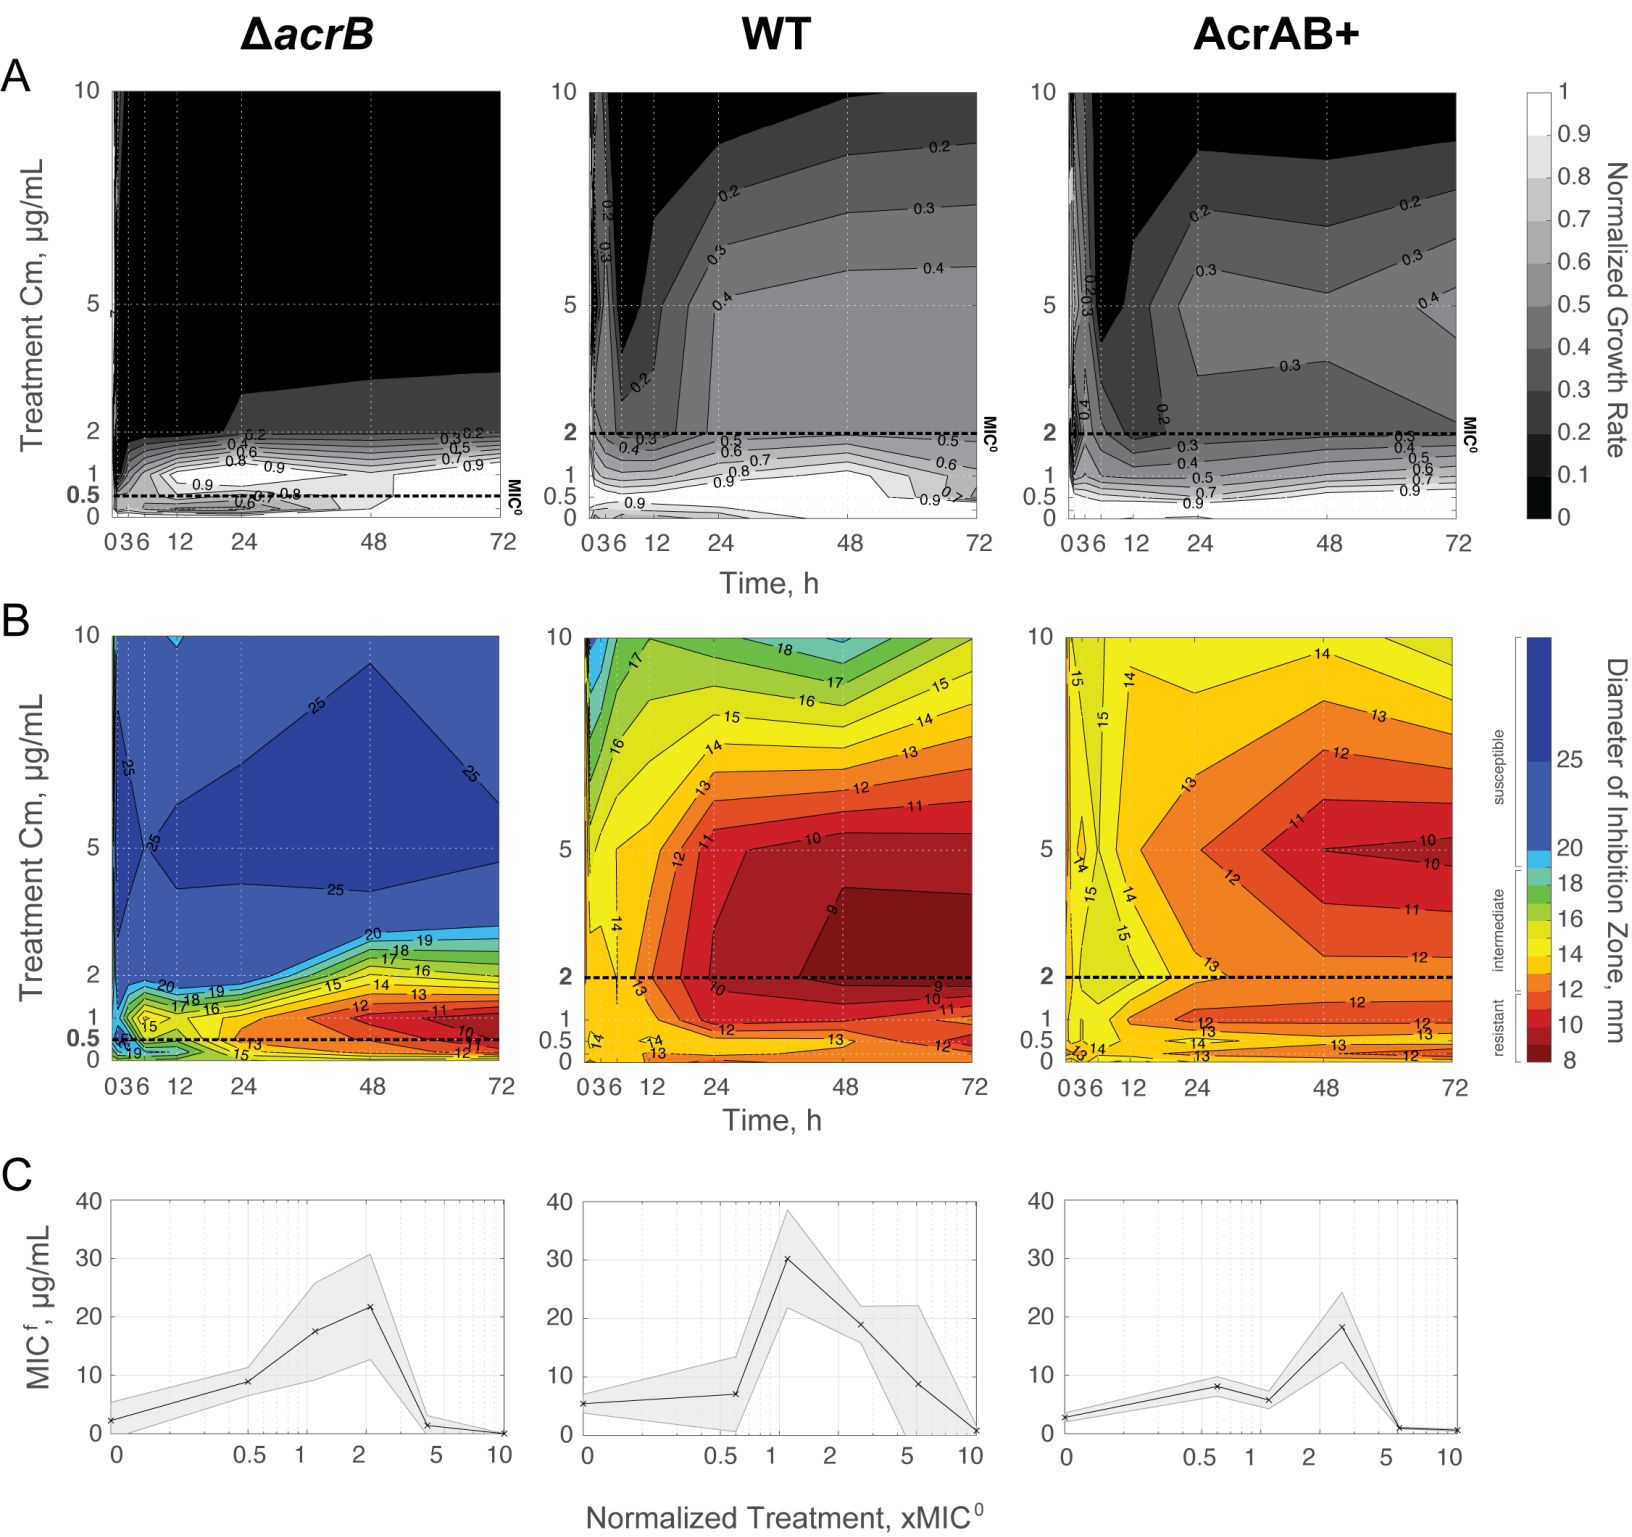

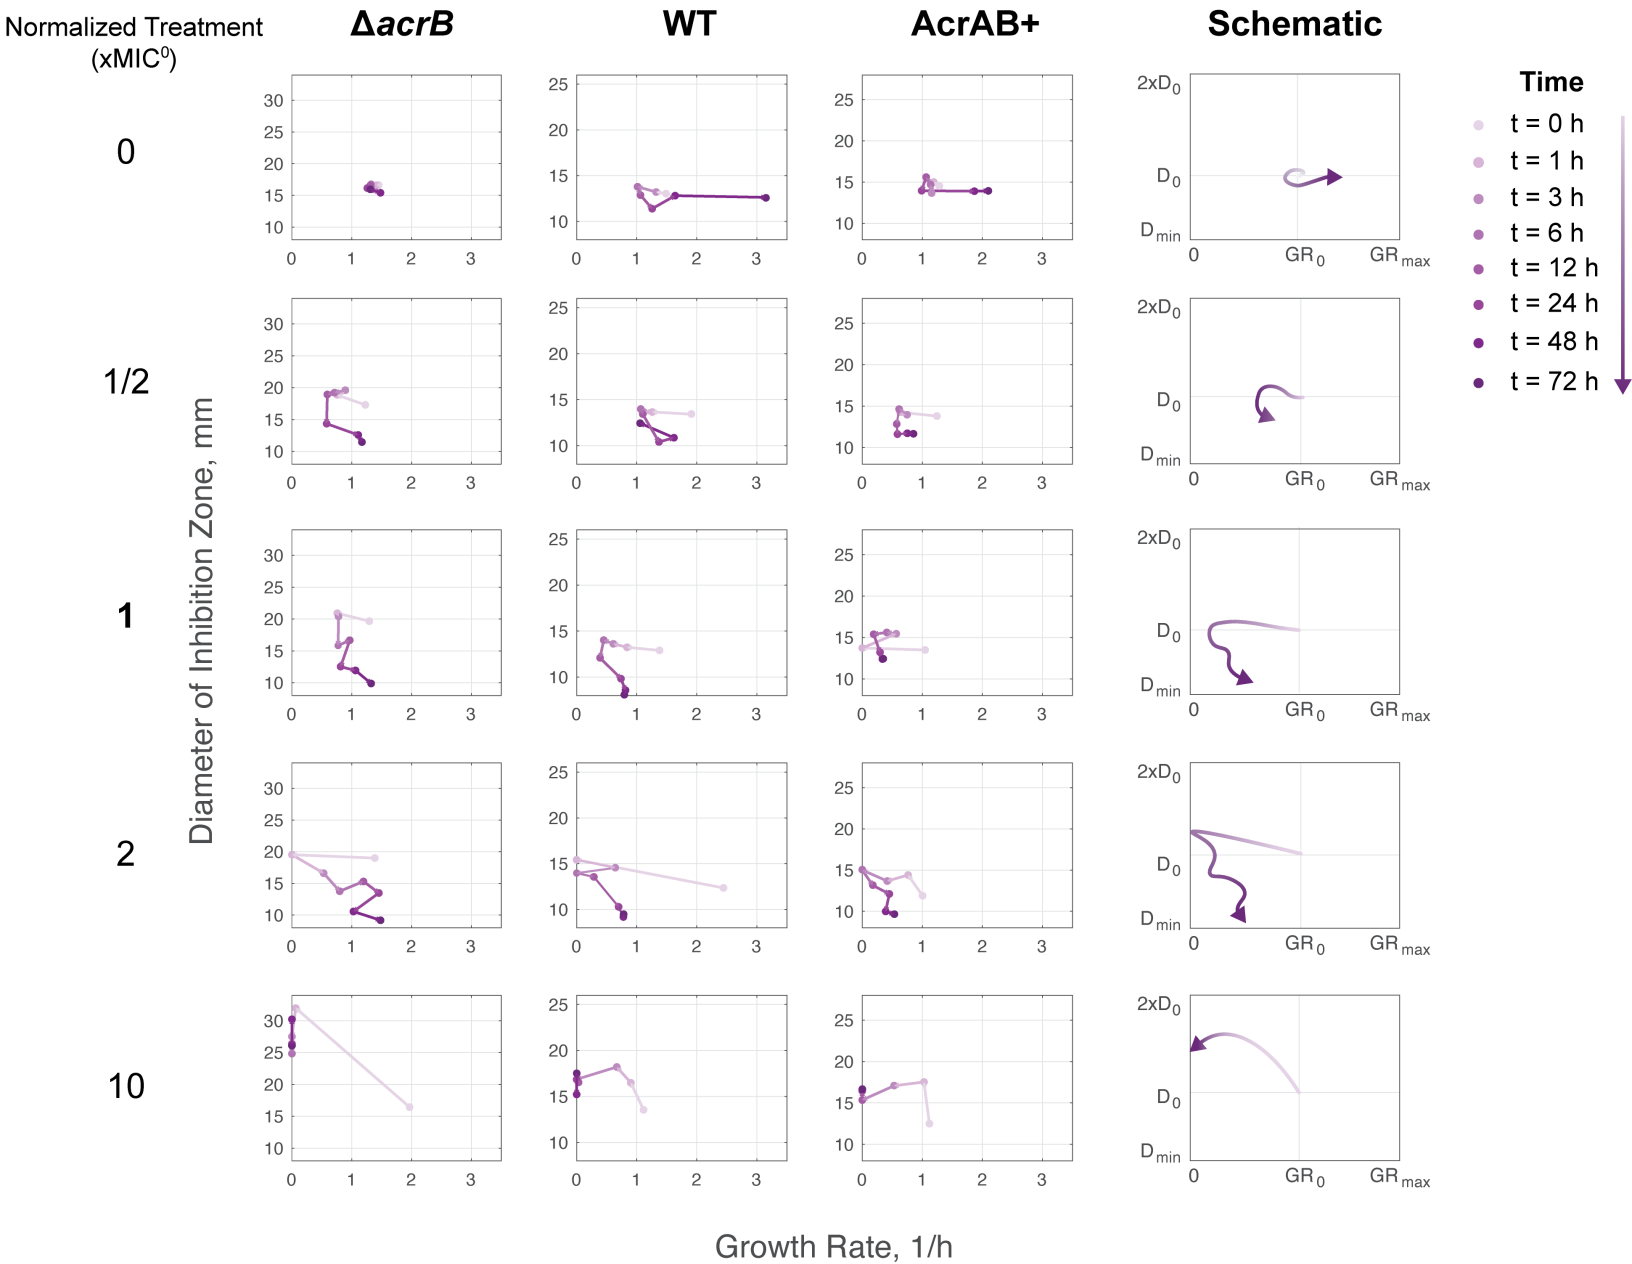

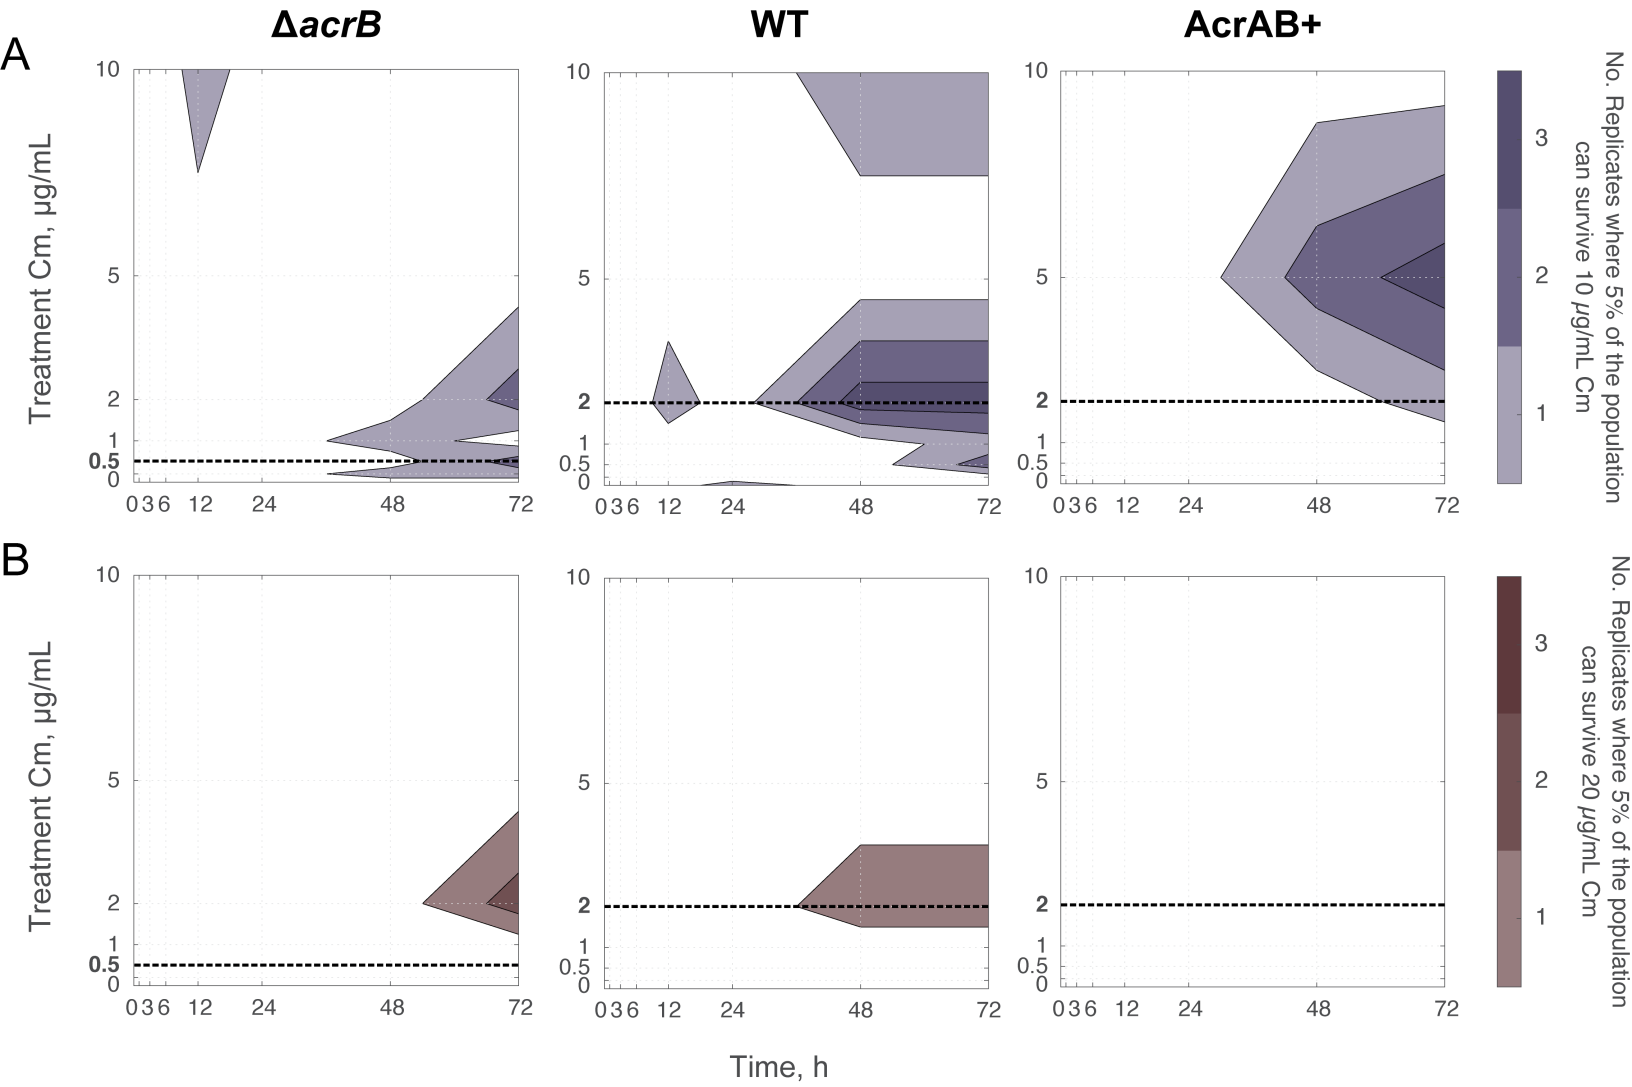

Source: https://www.biorxiv.org/content/10.1101/2020.07.07.192856v1.full.pdf
